1     **PHYSIOLOGICAL DIFFERENCES BETWEEN ADVANCED CROSSFIT ATHLETES,**  
2             **RECREATIONAL CROSSFIT PARTICIPANTS, AND PHYSICALLY-ACTIVE**  
3                     **ADULTS**

4  
5     <sup>1</sup>Gerald T. Mangine, <sup>1</sup>Matthew T. Stratton, <sup>1</sup>Christian G. Almeda, <sup>2</sup>Michael D. Roberts, <sup>1</sup>Tiffany  
6             A. Esmat, <sup>1</sup>Trisha A. VanDusseldorp, and <sup>1</sup>Yuri Feito

7  
8     <sup>1</sup>Exercise Science and Sport Management, Kennesaw State University, Kennesaw, Georgia

9     <sup>2</sup>School of Kinesiology, Auburn University, Auburn, Alabama

10

11     Running Title: Physiological characteristics among CrossFit athletes

12

13

14

15     Address for correspondence

16     Gerald T. Mangine, Ph.D.

17     ORCID# (0000-0003-2718-2564)

18     Exercise Science and Sport Management

19     Kennesaw State University

20     520 Parliament Garden Way NW

21     Kennesaw, GA 30144

22     Tel: 470-578-3425

23     [gmangine@kennesaw.edu](mailto:gmangine@kennesaw.edu)

## ABSTRACT

1  
2  
3 This investigation examined anthropometric, hormonal, and physiological differences between  
4 advanced (ADV;  $n = 8$ ,  $27.8 \pm 4.2$  years,  $170 \pm 11$  cm,  $79.8 \pm 13.3$  kg) and recreational (REC;  $n$   
5  $= 8$ ,  $33.5 \pm 8.1$  years,  $172 \pm 14$  cm,  $76.3 \pm 19.5$  kg) CrossFit (CF) trained participants in  
6 comparison to physically-active controls (CON;  $n = 7$ ,  $27.5 \pm 6.7$  years,  $171 \pm 14$  cm,  $74.5 \pm$   
7  $14.3$  kg). ADV and REC were distinguished by their past competitive success. REC and CON  
8 were resistance-trained ( $>2$  years) and exercised on  $3-5$  days  $\cdot$   $wk^{-1}$  for the past year, but CON  
9 utilized traditional resistance and cardiovascular exercise. All participants provided a fasted,  
10 resting blood sample and completed assessments of resting metabolic rate, body composition,  
11 muscle morphology, isometric mid-thigh pull strength, peak aerobic capacity, and a 3-minute  
12 maximal cycle ergometer sprint across two separate occasions (separated by 3-7 days). Blood  
13 samples were analyzed for testosterone, cortisol, and insulin-like growth factor-1. One-way  
14 analysis of variance revealed ADV to possess lower body fat percentage ( $6.7-8.3\%$ ,  $p = 0.007$ ),  
15 greater bone and non-bone lean mass ( $12.5-26.8\%$ ,  $p \leq 0.028$ ), muscle morphology  
16 characteristics ( $14.2-59.9\%$ ,  $p < 0.05$ ), isometric strength characteristics ( $15.4-41.8\%$ ,  $p < 0.05$ ),  
17 peak aerobic capacity ( $18.8-19.1\%$ ,  $p = 0.002$ ), and anaerobic performance ( $15.4-51.1\%$ ,  $p \leq$   
18  $0.023$ ) compared to both REC and CON. No differences were seen between REC and CON, or  
19 between all groups for resting metabolic rate or hormone concentrations. These data suggest  
20 ADV possess several physiological advantages over REC and CON, whereas similar  
21 physiological characteristics were present in individuals who have been regularly participating in  
22 either CF or resistance and cardiovascular training for the past year.

- 1 KEYWORDS: HIFT, hormones, resting metabolic rate, peak aerobic capacity, critical power,
- 2 strength

## INTRODUCTION

3  
4  
5       CrossFit® (CF) is a form of high-intensity functional training that combines resistance  
6 exercises, gymnastics, and traditional aerobic modalities (e.g., cycling, rowing, running) into  
7 single workouts that vary by day to elicit general physical preparedness (1, 2). This training form  
8 is enjoyed recreationally by participants of varying levels of fitness, training experience, age, and  
9 lifestyles (3) and also exists as its own sport. The primary CF competition is the Reebok CrossFit  
10 Games™ (the Games) which awards individual winners the title of “Fittest on Earth™”.  
11 Historically, this competition has consisted of several stages designed to narrow the initial  
12 participant pool (>400,000 athletes) down to the top athletes within each category (i.e., adult  
13 men, adult women, teenagers, Masters, teams). Although the existence, format and relevance of  
14 each stage have undergone changes throughout the competition’s existence (4, 5), the presence  
15 of an initial online qualifying round (e.g., the CrossFit Open™) has remained. This round  
16 typically involves multiple workout challenges that are completed over the course of several  
17 weeks. Competitors who complete all workouts and rank high enough will progress to the next  
18 stage of the competition (i.e., historically regionals, currently the Games or Sanctioned  
19 competitions that lead to the Games). Regardless of which stage, it is expected that each workout  
20 will consist of a set of challenges that will require some combination of strength, power,  
21 endurance, and/or sport-specific skill (1). However, little is known about which physiological  
22 factors are most influential of CF competition performance or distinguish competitive status.

23       Body mass (6), strength and anaerobic power (6-10), aerobic capacity (9), sport-specific  
24 skill (8, 10), and experience (9) have all been associated with either workout performance or  
25 competitive ranking. Collectively, these data imply that athletes must train to be proficient in

26 each to perform well in competition. However, several limitations exist among these studies that  
27 prevent making such a conclusion. For instance, Serafini et al. (2018) reported that higher  
28 ranking competitors of the 2016 Open were stronger, more powerful, and more proficient at  
29 short-duration, sprint-type CF workouts. Among regional competitors, final ranking was  
30 positively related to 400-m sprint time and time-to-completion in longer, benchmark workouts  
31 (i.e., Filthy-50) ( $r = 0.69 - 0.77$ ), and negatively related to maximal weight lifted in the Olympic  
32 lifts ( $r = -0.39$  to  $-0.42$ ) (10). Although these studies involved participants who have successful  
33 competitive records, the measures used to distinguish rank were all self-reported. As such, the  
34 authenticity and actual data of measurement (self-reported data were obtained from an online  
35 resource) cannot be verified. In contrast, others have measured a variety of physical parameters  
36 and related them to CF-style workouts performed in a controlled, laboratory setting (6, 7, 9).  
37 While these studies have also included successful CF athletes, laboratory workouts do not  
38 adequately emulate the competitive setting and may influence the physiological response to CF  
39 training (11-14). Thus, questions remain about the distinguishing characteristics of successful CF  
40 athletes.

41 In more traditional sports (e.g., football, baseball, basketball, etc.), identifying the key  
42 physiological and athletic characteristics that distinguish performance is common (15-18). The  
43 practice enables strength and conditioning professionals to develop sport-specific training  
44 programs that are more effective in translating adaptations to in-game performance. However,  
45 CF is unique in that typical training session workouts mirror those that appear in competition.  
46 Moreover and consistent with its primary purpose (1, 2), chronic participation in CF training has  
47 been documented to improve a variety of fitness parameters (19). Though it might be assumed  
48 that CF training represents an ideal training strategy for developing the physiological

49 characteristics that distinguish performance in the sport, such a conclusion would be premature  
50 based on the available data.

51 Evidence of CF training being more advantageous towards developing a variety of fitness  
52 outcomes in comparison to alternative training strategies (e.g., resistance training, high-intensity  
53 interval training) is equivocal (19-25). This is likely because most comparative training studies  
54 have utilized untrained or novice (to CF) participants, which is problematic because they do not  
55 require a very specific or intense training stimulus to elicit adaptations compared to experienced  
56 trainees (26). It is possible that either a longer training duration or more advanced participants  
57 are necessary to observe the advantages or disadvantages of the CF strategy. Unfortunately, elite  
58 competitors rarely share their training strategies and anecdotal evidence suggests that they  
59 incorporate more than what commonly occurs during a typical CF training session. To the best of  
60 our knowledge, only one well-controlled study exists where a variety of physiological  
61 parameters were examined in trained participants (27). In that cross-sectional investigation, men  
62 with at least on year of CF training experience outperformed their resistance-trained (> 1 year)  
63 counterparts in a multi-stage shuttle run test and possessed a higher aerobic capacity; all other  
64 measures were statistically similar. While this study provides evidence in favor of CF training,  
65 there was no aerobic training requirement for the resistance-trained group, and the actual  
66 experience of the CF group was unclear beyond their having participated in the strategy for at  
67 least one year. It is possible that multiple physiological differences exist when experience is  
68 considered. Therefore, the purpose of this study was to examine anthropometric, hormonal, and  
69 physiological differences between advanced CF athletes, recreational CF practitioners, and  
70 physically-active adults who regularly participate in both resistance and cardiovascular training.  
71 Since adaptations are specific to the training modality and effort (26), we hypothesized that body

72 composition, muscle morphology, aerobic and anaerobic performance, and strength would be  
73 different between groups. Specifically, the advanced CF athletes would outperform the other  
74 groups whereas recreational CF practitioners and physically-active adults would be similar.  
75 However, because resting hormonal concentrations do not typically change through training (14),  
76 it was hypothesized that these would be similar between groups.

77

## 78 **MATERIALS AND METHODS**

79

### 80 **Experimental Design**

81 For this cross-sectional study, physically-active adults were recruited and assigned into  
82 groups based on their experience with CF training and performance during specific CF  
83 competitions. Participants who possessed CF training experience (> 2 years) were classified as  
84 advanced (ADV) if they had previously qualified for the regional round of the Games  
85 competition. Otherwise, they were classified as recreational (REC) because they had never  
86 progressed beyond the opening round of the competition (i.e., The Open) but still trained on 3 –  
87 5 days per week for at least the previous year. Individuals who did not possess CF training  
88 experience but possessed resistance training experience (> 2 years) and participated in both  
89 resistance and cardiovascular training on 3 – 5 days per week for at least the previous year, were  
90 assigned to the physically-active control (CON) group. All participants reported to the Exercise  
91 Physiology Laboratory on two separate occasions, within one month of the onset of the Open, to  
92 complete all testing. During the first visit, each participant provided a fasted blood sample before  
93 completing assessments of muscle morphology and peak aerobic capacity. Participants returned  
94 to the Exercise Physiology Lab for the second visit (within 3 – 7 days of the first visit) to

95 complete assessments of resting metabolic rate, body composition, strength, and anaerobic  
96 performance. All testing sessions occurred in the morning (~6:00 – 10:00 a.m.) with the  
97 participants having abstained from unaccustomed physical activity and alcohol for 24 hours,  
98 caffeine for 12 hours, and fasted for 8 hours. Participants completed all measurements while  
99 wearing comfortable athletic clothing and were able to consume a light snack prior to  
100 performance testing (i.e., peak aerobic capacity, strength, and anaerobic performance). Prior to  
101 leaving the laboratory on the first visit, participants were asked to complete a 24-hour dietary  
102 recall, retain a copy, and follow a similar diet prior to their second visit. Comparisons were made  
103 between groups for all anthropometric, biochemical, and physiological measures.

104

## 105 **Participants**

106 Twenty-three physically-active adults ( $29.7 \pm 6.8$  years,  $171 \pm 12$  cm,  $76.9 \pm 15.4$  kg)  
107 agreed to participate in this study. All participants were free of any physical limitations  
108 (determined by medical and physical-activity history questionnaire and PAR-Q+) and had been  
109 regularly participating (at the time of recruitment) in their chosen exercise form (i.e., CrossFit  
110 training or Resistance/Cardiovascular training) for a minimum of 2 years. Participants in ADV ( $n$   
111 = 8,  $27.8 \pm 4.2$  years,  $170 \pm 11$  cm,  $79.8 \pm 13.3$  kg) reported having regularly participated in  
112 resistance training for  $11.5 \pm 5.8$  years and CF training for  $6.4 \pm 5.6$  years (6 – 7 sessions·week<sup>-1</sup>).  
113 As individual competitors, the highest rank these participants ever achieved in the Open was  
114  $659^{\text{th}} \pm 991^{\text{st}}$  (range:  $19^{\text{th}} - 3,052^{\text{nd}}$ ) within their respective divisions worldwide. While each of  
115 these athletes qualified for this study by having competed as members of a team in regional  
116 (highest average rank =  $11^{\text{th}} \pm 13^{\text{th}}$ ) and Games competition (highest average rank =  $20^{\text{th}} \pm 9^{\text{th}}$ ),  
117 three competed individually in their respective regions with one having progressed to the Games



118 on multiple occasions. REC participants ( $n = 8$ ,  $33.5 \pm 8.1$  years,  $172 \pm 14$  cm,  $76.3 \pm 19.5$  kg)  
119 reported having regularly participated in resistance training for  $8.1 \pm 7.9$  years and CF training  
120 for  $3.3 \pm 1.7$  years ( $4 - 5$  sessions·week<sup>-1</sup>). The highest rank these participants had ever achieved  
121 in the Open was  $22,306^{\text{th}} \pm 14,028^{\text{th}}$  (range:  $5,466^{\text{th}} - 44,315^{\text{th}}$ ) within their respective divisions  
122 worldwide. Participants in CON ( $n = 7$ ,  $27.5 \pm 6.7$  years,  $171 \pm 14$  cm,  $74.5 \pm 14.3$  kg) reported  
123 having  $7.6 \pm 4.8$  years of regular resistance training experience and incorporated  $3.7 \pm 1.3$   
124 sessions and  $3.6 \pm 1.0$  sessions of resistance and cardiovascular training per week. Although two  
125 participants in CON reported having previously participated in CF-style workouts, these did not  
126 occur with regularity ( $< 3$  sessions·week<sup>-1</sup>) or for an extended duration ( $< 1$  year) and they had  
127 never competed in the Open at the time of data collection. Following an explanation of all  
128 procedures, risks and benefits, each participant provided his or her written informed consent to  
129 participate in the study. The study was conducted in accordance with the Declaration of Helsinki,  
130 and the protocol was approved by the Kennesaw State University Institutional Review Board  
131 (#17-501).

132

### 133 **Blood sampling and biochemical analysis**

134 Blood samples were obtained on the first visit prior to any physical activity. All samples  
135 were obtained from an antecubital vein using a needle by a research team member who was  
136 trained and experienced in phlebotomy. Approximately 15 mL of blood was drawn into SST  
137 tubes (for serum collection) and EDTA-treated Vacutainer® tubes (for plasma). SST tubes were  
138 allowed to clot for 10 minutes prior to centrifugation, while EDTA treated tubes were  
139 centrifuged immediately for 10 minutes at 3600 rpms at 4 °C. The resulting serum and plasma  
140 were aliquoted and stored at -80°C until analysis.

141           Circulating concentrations of testosterone (T; in  $\text{ng}\cdot\text{dL}^{-1}$ ), cortisol (C; in  $\mu\text{g}\cdot\text{dL}^{-1}$ ), and  
142 insulin-like growth factor (IGF-1; in  $\text{ng}\cdot\text{mL}^{-1}$ ) were assessed via enzyme-linked immunosorbent  
143 assays (ELISA) via a 96-well spectrophotometer (BioTek, Winooski, VT) using commercially  
144 available kits. To eliminate inter-assay variance, all samples for each assay were thawed once  
145 and analyzed in duplicate in the same assay run by a single technician. Samples were analyzed in  
146 duplicate, with an average coefficient of variation of 1.63% for T, 6.88% for C, and 2.00% IGF-  
147 1.

148

### 149 **Muscle morphology**

150           Non-invasive skeletal muscle ultrasound images were collected from the right thigh and  
151 arm locations of all participants. This technique uses sound waves at fixed frequencies to create  
152 *in vivo*, real time images of the limb musculature. Prior to image collection, all anatomical  
153 locations of interest were identified using standardized landmarks for the rectus femoris (RF),  
154 vastus medialis (VM), vastus lateralis (VL), biceps brachii (BB), and triceps brachii (TB)  
155 muscles. The landmarks for the thigh musculature were identified along the longitudinal distance  
156 over the femur. The RF and VM were respectively assessed at 50% and 20% of the distance from  
157 the proximal border of the patella to the anterior, inferior suprailiac crest. The VL was assessed  
158 at 50% of the distance from the lateral condyle of the tibia to the most prominent point of the  
159 greater trochanter of the femur. VL measurement required the participant to lay on their side.  
160 Landmark identification of the BB and TB required the participant to sit upright on the  
161 examination table and extend their arm to rest upon the shoulder of the researcher. Both muscles  
162 were assessed along the humerus at a position equal to 40% of the distance from the lateral  
163 epicondyle to the acromion process of the scapula (28). Subsequently, the participant resumed

164 laying supine on the examination table for a minimum of 5 – 10 minutes to allow fluid shifts to  
165 occur before images were collected (29). The same investigator performed all landmark  
166 measurements for each participant.

167 A 12 MHz linear probe scanning head (General Electric LOGIQ S7 Expert, Wauwatosa,  
168 WI, USA) was coated with water soluble transmission gel to optimize spatial resolution and used  
169 to collect all ultrasound images. Collection of each image began with the probe being positioned  
170 on (and perpendicular to) the surface of the skin to provide acoustic contact without depressing  
171 the dermal layer. Subsequently, two consecutive images were collected in the extended field of  
172 view mode (Gain = 50 dB; Image Depth = 5 – 6 cm) using a cross-sectional sweep in the axial  
173 plane to capture panoramic images of each muscle. At the same sites, two consecutive images  
174 were collected with the probe oriented longitudinal to the muscle tissue interface using  
175 Brightness Mode (B-mode) ultrasound (30). Each of these images included a horizontal line  
176 (approximately 1 cm), located below the image, which was used for calibration purposes when  
177 analyzing the images offline (31). To capture images of the RF and VM, the participant remained  
178 in the supine position, with their legs extended but relaxed. A rolled towel was placed beneath  
179 the popliteal fossa of the dominant leg, allowing for a 10° bend in the knee as measured by a  
180 goniometer, and the dominant foot secured (32). For the VL, the participant was placed on their  
181 side with their legs together and the rolled towel between their knees. Once again, the legs were  
182 positioned to allow a 10° bend in the knees, as measured by a goniometer (32). Measurement of  
183 the BB and TB required the participant to sit upright with their arm extended, resting on the  
184 shoulder of the researcher. The same investigator positioned each participant and collected all  
185 images.

186           After all images were collected, the ultrasound data were transferred to a personal  
187 computer for analysis via Image J (National Institutes of Health, Bethesda, MD, USA, version  
188 1.45s) by the same technician. All panoramic images were used to measure cross-sectional area  
189 (CSA) and echo intensity. For these measures, the polygon tracking tool in the ImageJ software  
190 was used to isolate as much lean muscle as possible without any surrounding bone or fascia (30).  
191 Subsequently, Image J calculated the area contained within the traced muscular image and  
192 reported this value in centimeters squared ( $\pm 0.1\text{cm}^2$ ). Concurrently, echo intensity was  
193 determined by grayscale analysis using the standard histogram function in ImageJ (30) and  
194 expressed as an arbitrary unit (au) value between 0 – 255 (0: black; 255: white) with lower  
195 values reflecting more contractile tissue within each muscle (30, 33). Mean echo intensity values  
196 were then corrected for subcutaneous fat thickness (SFT; averaged from the SFT values obtained  
197 at the medial, midline, and lateral sites of each muscle) using Equation 1 (34). All B-mode  
198 images were used to measure muscle thickness ( $\pm 0.01$  cm; perpendicular distance between the  
199 superficial and deep aponeuroses) and pennation angle ( $\pm 0.1^\circ$ ; intersection of the fascicles with  
200 the deep aponeurosis). Fascicle length ( $\pm 0.1$  cm) across the deep and superficial aponeuroses  
201 was estimated from muscle thickness and pennation angle using Equation 2. Intraclass  
202 correlation coefficients ( $\text{ICC}_{3,k} = 0.77 - 0.99$ ) for determining muscle thickness, pennation angle,  
203 CSA and echo intensity was previously determined in ten active, resistance-trained men ( $25.3 \pm$   
204  $2.0$  years,  $180 \pm 7$  cm,  $90.8 \pm 6.8$  kg) using the methodology described above. The methodology  
205 for determination of FL has a reported estimated coefficient of variation of 4.7% (35).

206 Equation 1:   Corrected echo intensity (EI) = Raw echo intensity + (SFT x 40.5278)

207 Equation 2:   Fascicle length = Muscle thickness  $\cdot \sin(\text{pennation angle})^{-1}$

208

209 **Peak aerobic capacity**

210 Peak aerobic capacity ( $\text{VO}_{2\text{peak}}$ ;  $\text{ml}\cdot\text{kg}^{-1}\cdot\text{min}^{-1}$ ), respiratory compensation threshold  
211 (RCT;  $\text{ml}\cdot\text{kg}^{-1}\cdot\text{min}^{-1}$ ), and gas exchange threshold (GET;  $\text{ml}\cdot\text{kg}^{-1}\cdot\text{min}^{-1}$ ) were assessed using a  
212 continuous, ramp exercise protocol performed on an electromagnetic-braked cycle ergometer  
213 (Lode Excalibur Sport, Lode., B.V., Groningen, The Netherlands). Prior to testing, each  
214 participant completed a standardized warm-up that consisted of riding a cycle ergometer for 5  
215 minutes at the participant's preferred resistance and cadence followed by 10 body weight squats,  
216 10 alternating lunges, 10 walking knee hugs and 10 walking butt kicks. Participants were then  
217 permitted to continue their warm-up with any additional practices that would help them feel  
218 comfortable entering the test. Participants were fitted with a heart rate (HR) monitor (Team<sup>2</sup>,  
219 Polar, Lake Success, NY), a nose clip, and a 2-way valve mask connected to a metabolic  
220 measurement system (True One 2400, ParvoMedics Inc., Salt Lake City, UT) to measure expired  
221 gases. The cycle ergometer seat height and handlebar distance were adjusted to the participant's  
222 comfort. The participants initially completed a 3-minute warm-up period with the resistance set  
223 at 50 W before starting the test at 75 W. During testing, the participants were asked to maintain a  
224 self-selected pedaling rate ( $> 50 \text{ rpm}'\text{s}$ ) while power output was increased by 25 W every minute  
225 until volitional fatigue or pedaling rate dropped below 50 rpm's for longer than 15 seconds.  
226 Upon completion of the test, each participant immediately progressed to a 3-minute active  
227 recovery period where they continued to pedal at their own cadence against a 50 W load. HR was  
228 assessed on each minute of the 3-minute recovery period. Participants were then removed from  
229 the cycle ergometer and asked to rest in a chair for an additional two minutes.

230 Relative oxygen consumption values (i.e.,  $\text{VO}_2\cdot\text{kg}^{-1}$ ) collected on each breath were  
231 averaged using the 11-breath averaging technique (36) and used to determine the highest value

232 achieved during the test (i.e.,  $\text{VO}_2$ peak). RCT, also known as the second ventilatory threshold,  
233 was identified as the  $\text{VO}_2$  value at which the increase in ventilation- $\text{VO}_2$  relationship was  
234 accompanied by an increase in the ventilation- $\text{VCO}_2$  relationships (37). The GET was  
235 determined using the V-slope method described by Beaver et al. (38). The GET was defined as  
236 the  $\text{VO}_2$  value corresponding to the intersection of two linear regression lines derived separately  
237 from the data points below and above the breakpoint in the  $\text{CO}_2$  produced ( $\text{VCO}_2$ ) versus the  
238  $\text{VO}_2$  relationship (39).

239

#### 240 **Dietary recall**

241 Participant's dietary intake was tracked for the 24-hour period preceding each visit via a  
242 paper dietary food recall form. All participants were instructed on how to properly log their food,  
243 snacks and drinks via the paper form. Specifically, following their enrollment on their first visit,  
244 participants were asked to record their food intake (breakfast, lunch, dinner, drinks and snacks)  
245 for the previous 24 hours prior. Prior to leaving the laboratory on the first visit, the participants  
246 were given a copy of their food recall form and asked to consume a similar diet during the 24  
247 hours prior to their second visit. Each form was visually inspected to confirm dietary  
248 compliance.

249

#### 250 **Resting metabolic rate assessment**

251 Resting metabolic rate (RMR,  $\text{kcal}\cdot\text{day}^{-1}$ ) assessment was completed in a quiet room  
252 with minimal lighting (e.g., only light from the RMR machine) located within the Exercise  
253 Physiology Laboratory. Prior to their arrival, participants were informed of all pre-test guidelines  
254 as outlined by Compher et al. (40). These included: 1) avoiding alcohol consumption 24 hours

255 prior to testing, 2) no food or caffeine ingestion 8 and 12 hours prior to testing, respectively, and  
256 3) discontinuing unaccustomed physical activity 24 hours prior to testing. Resting metabolic rate  
257 was measured via a metabolic measurement system (Parvo Medics TrueOne 2400, ParvoMedics  
258 Inc., Salt Lake City, UT) utilizing a ventilated hood. Participants were asked to rest in the supine  
259 position with the ventilated hood placed over their face and neck for a maximum of 30 minutes.  
260 RMR determination was based on a 5-minute interval of measured volume of oxygen  
261 consumption ( $\text{VO}_2$ ) with a coefficient of variation less than 10% (40). The average coefficient of  
262 variation was 6.36%.

263

#### 264 **Body composition assessments**

265 Initially, height ( $\pm 0.1$  cm) and body mass ( $\pm 0.1$  kg) were determined using a stadiometer  
266 (WB-3000, TANITA Corporation, Tokyo, Japan) with the participants standing barefoot, with  
267 feet together, in their normal daily attire. Subsequently, body composition was assessed by three  
268 common methods (i.e., dual energy X-ray absorptiometry [iDXA, Lunar Corporation, Madison,  
269 WI], air displacement plethysmography [BodPod, COSMED USA Inc., Chicago, IL], and  
270 bioelectrical impedance analysis [770 Body Composition and Body Water Analyzer, InBody,  
271 Seoul, South Korea]) using standardized procedures. Briefly, iDXA scanning required  
272 participants to remove any metal or jewelry and lay supine on the iDXA table prior to an entire  
273 body scan in “standard” mode using the company’s recommended procedures and supplied  
274 algorithms. Quality assurance was assessed by daily calibrations performed prior to all scans  
275 using a calibration block provided by the manufacturer. All iDXA measurements were  
276 performed by the same researcher using standardized subject positioning procedures. For air  
277 displacement plethysmography, the device and associated scale were calibrated daily using a

278 known volume and mass provided by the manufacturer. During testing, participants were asked  
279 to wear a tight-fitting bathing suit or compression shorts and swim cap before entering the  
280 device. Two trials were performed for each participant to obtain two measurements of body  
281 volume within 150 mL. A third trial was performed if body volume estimates from the first two  
282 trials were not within 150 mL, and values from the two closest trials were averaged. Thoracic  
283 lung volume was estimated (41). Bioelectrical impedance analysis required participants to stand  
284 barefoot on two metal sensors located at the base of the device and hold two hand grips for  
285 approximately 30 – 60 seconds. Prior to stepping onto the device, participants cleaned the soles  
286 of their feet with alcohol wipes provided by the manufacturer.

287         Following testing, body mass, bone mineral content (BMC; from iDXA), body volume  
288 (from BodPod), and total body water (from bioelectrical impedance analysis) were entered into a  
289 4-compartment model, Equation 3 to estimate body fat percentage (BF%) (42), fat mass ( $\pm 0.1$   
290 kg), and fat-free mass ( $\pm 0.1$  kg). These values, along with regional (arms [sum of each arm],  
291 legs [sum of each leg], and trunk [sum of spine and pelvis]) estimates of bone mineral content ( $\pm$   
292 0.1 kg) and non-bone lean mass ( $\pm 0.1$  kg) obtained from iDXA following manual demarcation  
293 of these regions of interest were used for all group comparisons. Intraclass correlation  
294 coefficients ( $ICC_{3,1} = 0.74 - 0.99$ ) for manually determining regional estimates of bone mineral  
295 content and non-bone lean mass had been previously found in 10 healthy, physically-active  
296 adults ( $25.1 \pm 2.4$  years;  $176 \pm 7$  cm,  $81.1 \pm 18.5$  kg).

297 Equation 3: 
$$BF\% = \frac{(2.748 \times volume) - (0.699 \times water) + (1.129 \times BMC) - (2.051 \times Body\ Mass)}{Body\ Mass} \times 100$$

298

299

300



## 301 **Strength assessment**

302           Following RMR and body composition assessments, strength was assessed by an  
303 isometric mid-thigh pull test. Prior to testing, each participant completed the same standardized  
304 warm-up described for the first visit (i.e., 5 minutes of cycling, dynamic stretching, additional  
305 self-selected warm-up practices) followed by a protocol specific to the isometric mid-thigh pull  
306 test. The specific component included three isometric efforts on an immobilized barbell  
307 positioned at approximately the mid-thigh using a perceived intensity of 50, 70, and 90% of  
308 maximum effort, interspersed with a one-minute recovery. The specific warm-up and isometric  
309 mid-thigh pull test were completed within a power rack (Rogue Fitness, Columbus, OH) while  
310 standing upon a portable force plate (Accupower, AMTI, Watertown, MA). While standing on  
311 the force plate, the mid-thigh position was determined for each participant before testing by  
312 marking the midpoint distance between the knee and hip joints. Each participant was instructed  
313 to assume their preferred second pull power-clean position by self-selecting their hip and knee  
314 angles. The height of the barbell was adjusted to a position approximately equal ( $\pm 2.54$  cm) to  
315 the mid-thigh. The participants were then asked to use an overhand, hooked grip on the barbell.  
316 The hook grip was selected for this test because all participants reported having had experience  
317 with the technique and it is commonly used among CF athletes during competition. Participants  
318 were also allowed to wrap their thumbs with athletic training tape and use chalk. Upon the  
319 researcher's "3, 2, 1, Go!" command, the participants were instructed to pull upwards on the  
320 barbell as hard and as fast as possible and to continue their maximal effort for 6 seconds. All  
321 participants were instructed to relax before the command "GO!" to avoid precontraction and  
322 were allotted three maximal attempts. The portable force plate measured the ground reaction  
323 forces, imposed onto the plate by the participant, as he/she pulled upon the bar. Peak force (F; in

324 N) production, peak and average rate of force development ( $RFD_{PEAK}$ ,  $RFD_{AVG}$ ; in  $N \cdot s^{-1}$ ), and F  
325 and RFD across specific time bands (i.e., 0–30, 0–50, 0–90, 0–100, 0–150, 0–200, and 0–250  
326 milliseconds) were subsequently calculated, as previously described (43).

327

### 328 **Anaerobic performance assessment**

329       Following the strength assessment, anaerobic performance was assessed via a 3-minute  
330 maximal sprint on an electromagnetic-braked cycle ergometer (Lode Excalibur Sport, Lode.,  
331 B.V., Groningen, The Netherlands). Prior to the test, seat height and handlebar positions were  
332 adjusted to mirror their positions during the peak aerobic capacity test, and participants were  
333 provided with time (~3 – 5 minutes) to acclimate to the cycle ergometer. A 5-minute rest period  
334 was then allotted before initiating the testing protocol, which has been previously described in  
335 detail elsewhere (44). Briefly, the test began with a 1-minute baseline period that involved 55  
336 seconds of unloaded cycling at 90 rpm and then accelerating up to approximately 110 rpm over  
337 the last 5 seconds of the minute. The protocol immediately transitioned to the 3-minute testing  
338 period where the participants attempted to maintain cadence as high as possible throughout its  
339 entirety. Resistance for the test was set using the linear mode of the cycle ergometer (linear  
340 factor = power / [preferred cadence]<sup>2</sup>). That is, the linear factor was calculated as the power  
341 output halfway between the  $VO_{2peak}$  and GET, divided by the preferred cadence of untrained  
342 cyclists (70 rpm<sup>2</sup>) (45-47). To prevent pacing and ensure an all-out effort, participants were not  
343 informed of the elapsed time and strong verbal encouragement was provided. After 3 minutes,  
344 the participants progressed to a 3-minute recovery stage at 50 Watts at their preferred cadence.  
345 Peak power ( $\pm 1$  W), critical power (CP; average power over the final 30 seconds of the test;  $\pm 1$

346 W) (46), and anaerobic work capacity (AWC; work done above CP; ( $\pm 0.1$  kJ) (47) were  
347 calculated based upon performance during the 3-minute sprint test.

348

### 349 **Statistical analysis**

350 Data were modeled using both a frequentist and Bayesian approach. The frequentist  
351 approach involved a two-way (Group x Sex) analysis of variance (ANOVA) for each dependent  
352 variable. Assumptions of normality and equal variance were verified by Shapiro-Wilk and  
353 Levene's tests, respectively. Significant interactions and main effects were further examined  
354 using Tukey's post-hoc analysis. Criterion alpha was set at  $p \leq 0.05$ . To further assess the  
355 likelihood (or the effect of group and/or sex) of the data under the alternative hypothesis  
356 compared to the null hypothesis, a two-way Bayesian ANOVA was performed with default prior  
357 scales (48). Likelihood was represented in the form of Bayes factors (i.e.,  $BF_{10}$ ) and were  
358 interpreted according to the recommendations of Wagenmakers et al. (49). That is, data were  
359 interpreted as evidence in favor of the null hypothesis when  $BF_{10} < 1$ . Otherwise, it was  
360 interpreted as "anecdotally" ( $1 < BF_{10} < 3$ ), "moderately" ( $3 < BF_{10} < 10$ ), "strongly" ( $10 < BF_{10}$   
361  $< 30$ ), "very strongly" ( $30 < BF_{10} < 100$ ), or "extremely" ( $BF_{10} > 100$ ) in favor of the alternative  
362 hypothesis. All statistical analyses were performed using JASP 0.10.2 (Amsterdam, the  
363 Netherlands). All data are reported as mean  $\pm$  standard deviation.

364

365

366

367

368

369

## RESULTS

370

### 371 Resting hormone concentrations

372 No interactions were observed for T, C, IGF-1. However, a trend for an interaction ( $F =$   
373  $2.87, p = 0.090$ ) driven by a main sex effect was seen for T ( $F = 6.11, p = 0.027$ ) with anecdotal  
374 differences between sexes being 2.058 times likely compared to the null hypothesis. Specifically,  
375 women in ADV tended to exhibit lower T concentrations ( $p = 0.83$ ) than ADV men. Male and  
376 female hormone concentrations are illustrated in Fig 1.

377

378 Fig 1. Male and female resting concentrations in A) testosterone, B) cortisol, and C) IGF-1.

379

### 380 Muscle morphology

381 Measures of muscle morphology for each group and sex are presented in Table 1.

382 Significant ( $p < 0.05$ ) group x sex interactions were observed for BB fascicle length and EI for  
383 each muscle, though the likelihood of these interactions favored the null hypotheses ( $BF_{10} < 1$ ).

384 Rather, the observed interactions were primarily driven by *anecdotal-to-strong* evidence ( $1.7 <$   
385  $BF_{10} < 30.0$ ) of main effects for sex and group. The observed interaction for BB fascicle length

386 was primarily driven by a main effect for sex where women were 8.8 times more likely to  
387 possess shorter fascicles than men, specifically REC women compared to the men of REC ( $p =$   
388  $0.029$ ) and CON ( $p = 0.012$ ). Though the underlying causes for the interactions seen for EI

389 varied with each muscle, *anecdotal-to-moderate* evidence indicated that men were 1.7 – 5.5  
390 times more likely to possess a lower EI than women. Specifically, women in REC possessed

391 higher EI ( $p < 0.05$ ) than men in ADV (RF, VL, and TB; a trend [ $p = 0.056$ ] for VM) and REC

392 (RF, VM, VL, and TB; a trend [ $p = 0.087$ ] was noted for BB), and tended ( $p < 0.10$ ) to be higher

393 than men in CON (RF, VL, and TB). Even though a main effect was not seen, the effect of group  
394 was 2.4 – 30.0 times likely to influence EI. Specifically, post-hoc analysis of the interaction  
395 showed that women in REC possessed higher EI than their counterparts in ADV (RF, VM, VL,  
396 and TB).

397         Significant group effects were found for muscle thickness (VL and BB), pennation angle  
398 (BB and TB), fascicle length of TB, and CSA (VM and VL). Compared to CON, ADV possessed  
399 greater muscle thickness in VL ( $p = 0.013$ ,  $BF_{10} = 3.0$ ) and in BB ( $p = 0.012$ ,  $BF_{10} = 2.2$ ), larger  
400 BB pennation angle ( $p = 0.007$ ,  $BF_{10} = 21.9$ ), and greater CSA in VM ( $p = 0.050$ ,  $BF_{10} = 2.1$ )  
401 and VL ( $p = 0.009$ ,  $BF_{10} = 0.7$ ). Compared to REC, ADV possessed greater muscle thickness in  
402 VL ( $p = 0.026$ ,  $BF_{10} = 1.9$ ), larger pennation angle in TB ( $p = 0.009$ ,  $BF_{10} = 3.2$ ), longer fascicles  
403 in TB ( $p = 0.019$ ,  $BF_{10} = 3.9$ ), and greater CSA in VL ( $p = 0.009$ ,  $BF_{10} = 0.8$ ); a tendency for  
404 greater muscle thickness in BB was also noted for ADV compared to REC ( $p = 0.086$ ,  $BF_{10} =$   
405 0.9). No differences were seen between REC and CON. Morphological comparisons are  
406 presented in Table 1.

407 Table 1. Measures of muscle morphology by group and sex.

|                                         |                  | ADV                   |                       | REC                      |                         | CON                   |                         | Group    |                  | Sex      |                  | Group x Sex |                  |
|-----------------------------------------|------------------|-----------------------|-----------------------|--------------------------|-------------------------|-----------------------|-------------------------|----------|------------------|----------|------------------|-------------|------------------|
|                                         |                  | Women                 | Men                   | Women                    | Men                     | Women                 | Men                     | <i>p</i> | BF <sub>10</sub> | <i>p</i> | BF <sub>10</sub> | <i>p</i>    | BF <sub>10</sub> |
| Muscle thickness (cm)                   | Rectus femoris   | 2.48 ± 0.36           | 3.28 ± 0.50           | 2.32 ± 0.27              | 2.86 ± 0.20             | 2.46 ± 0.25           | 2.61 ± 0.43             | 0.155    | 8.2              | 0.004    | 6.7              | 0.248       | 0.5              |
|                                         | Vastus medialis  | 3.44 ± 0.84           | 4.35 ± 0.58           | 2.77 ± 0.08              | 4.28 ± 0.61             | 3.41 ± 0.62           | 4.26 ± 0.22             | 0.439    | >100             | 0.001    | 39.8             | 0.502       | 0.3              |
|                                         | Vastus lateralis | 1.92 ± 0.49           | 2.47 ± 0.39           | 1.49 ± 0.25              | 1.97 ± 0.19             | 1.63 ± 0.19           | 1.67 ± 0.28             | 0.009    | 11.9             | 0.017    | 7.9              | 0.288       | 1.7              |
|                                         | Biceps brachii   | 3.32 ± 0.60           | 4.29 ± 0.87           | 2.62 ± 0.19              | 3.74 ± 0.71             | 2.43 ± 0.08           | 3.31 ± 0.17             | 0.013    | >100             | 0.001    | 40.6             | 0.910       | 1.3              |
|                                         | Triceps brachii  | 2.51 ± 0.45           | 3.05 ± 0.76           | 2.44 ± 0.64              | 2.91 ± 0.58             | 1.98 ± 0.24           | 3.05 ± 0.43             | 0.674    | 7.1              | 0.008    | 2.1              | 0.541       | 0.3              |
| Pennation angle (°)                     | Rectus femoris   | 12.7 ± 3.5            | 15.5 ± 0.5            | 10.0 ± 3.0               | 14.5 ± 1.2              | 13.3 ± 5.6            | 16.4 ± 5.5              | 0.375    | 2.9              | 0.036    | 1.4              | 0.894       | 0.5              |
|                                         | Vastus medialis  | 19.2 ± 3.9            | 26.2 ± 9.3            | 17.2 ± 3.4               | 24.9 ± 6.0              | 27.7 ± 10.8           | 24.0 ± 3.5              | 0.417    | 0.7              | 0.216    | 0.4              | 0.229       | 0.2              |
|                                         | Vastus lateralis | 14.3 ± 3.1            | 14.8 ± 2.9            | 10.7 ± 3.4               | 12.4 ± 5.8              | 12.3 ± 0.4            | 13.2 ± 3.5              | 0.286    | 0.6              | 0.502    | 0.5              | 0.947       | 0.1              |
|                                         | Biceps brachii   | 13.6 ± 3.1            | 17.5 ± 2.2            | 12.8 ± 2.1               | 12.3 ± 5.0              | 10.5 ± 2.2            | 9.7 ± 1.5               | 0.009    | 7.0              | 0.489    | 3.2              | 0.249       | 0.4              |
|                                         | Triceps brachii  | 17.9 ± 5.1            | 26.8 ± 7.8            | 11.1 ± 3.2               | 16.8 ± 4.5              | 14.2 ± 2.6            | 20.3 ± 4.1              | 0.012    | 34.5             | 0.004    | 13.8             | 0.791       | 2.4              |
| Fascicle length (cm)                    | Rectus femoris   | 12.2 ± 5.1            | 12.3 ± 2.2            | 14.1 ± 3.8               | 11.5 ± 0.8              | 12.8 ± 7.6            | 10.3 ± 4.5              | 0.852    | 0.6              | 0.365    | 0.3              | 0.786       | 0.1              |
|                                         | Vastus medialis  | 10.6 ± 2.4            | 11.2 ± 4.8            | 9.6 ± 1.8                | 10.6 ± 2.7              | 7.9 ± 2.4             | 10.6 ± 1.1              | 0.552    | 0.6              | 0.280    | 0.3              | 0.758       | 0.1              |
|                                         | Vastus lateralis | 7.7 ± 0.4             | 9.9 ± 2.1             | 8.3 ± 1.5                | 10.5 ± 4.6              | 7.6 ± 0.6             | 7.7 ± 2.2               | 0.399    | 0.8              | 0.163    | 0.4              | 0.643       | 0.2              |
|                                         | Biceps brachii   | 14.5 ± 2.8            | 14.2 ± 1.3            | 12.0 ± 1.1 <sup>df</sup> | 19.0 ± 4.8 <sup>c</sup> | 13.8 ± 2.8            | 19.9 ± 2.7 <sup>c</sup> | 0.271    | 9.8              | 0.002    | 8.8              | 0.043       | 0.5              |
|                                         | Triceps brachii  | 8.7 ± 2.8             | 7.3 ± 2.9             | 12.8 ± 1.7               | 10.5 ± 3.1              | 8.2 ± 0.9             | 9.1 ± 2.2               | 0.018    | 4.3              | 0.370    | 2.4              | 0.448       | 0.5              |
| Cross-sectional area (cm <sup>2</sup> ) | Rectus femoris   | 10.8 ± 2.4            | 17.8 ± 3.3            | 8.8 ± 1.5                | 15.6 ± 1.8              | 11.2 ± 1.3            | 15.0 ± 2.8              | 0.216    | >100             | 0.000    | >100             | 0.364       | 0.4              |
|                                         | Vastus medialis  | 24.3 ± 6.6            | 29.8 ± 4              | 17.0 ± 3.9               | 27.8 ± 6.4              | 18.2 ± 2.1            | 23.7 ± 1.2              | 0.046    | 22.3             | 0.002    | 12.0             | 0.441       | 0.8              |
|                                         | Vastus lateralis | 29.8 ± 4.1            | 44.9 ± 4.1            | 24.4 ± 2.6               | 38.2 ± 4.5              | 24.1 ± 1.7            | 37.9 ± 3.0              | 0.004    | >100             | 0.001    | >100             | 0.912       | 0.5              |
|                                         | Biceps brachii   | 8.4 ± 1.7             | 17.7 ± 9.2            | 7.4 ± 2.0                | 14.9 ± 2.5              | 7.9 ± 0.2             | 12.9 ± 1.0              | 0.464    | 77.5             | 0.001    | 32.6             | 0.622       | 0.3              |
|                                         | Triceps brachii  | 10.5 ± 1.2            | 18 ± 4.3              | 7.0 ± 1.4                | 17.0 ± 5.7              | 8.9 ± 1.4             | 14.0 ± 3.6              | 0.273    | >100             | 0.000    | >100             | 0.417       | 0.3              |
| Echo intensity (au)                     | Rectus femoris   | 116 ± 26 <sup>c</sup> | 113 ± 11 <sup>c</sup> | 174 ± 33 <sup>abd</sup>  | 97 ± 14 <sup>ce</sup>   | 151 ± 16 <sup>d</sup> | 129 ± 14                | 0.061    | 30.0             | 0.001    | 5.5              | 0.008       | 0.6              |
|                                         | Vastus medialis  | 105 ± 16 <sup>c</sup> | 108 ± 11              | 153 ± 39 <sup>ad</sup>   | 104 ± 12 <sup>c</sup>   | 116 ± 11              | 134 ± 13                | 0.093    | 2.4              | 0.289    | 0.8              | 0.012       | 0.4              |
|                                         | Vastus lateralis | 111 ± 20 <sup>c</sup> | 113 ± 15 <sup>c</sup> | 171 ± 42 <sup>abd</sup>  | 107 ± 19 <sup>c</sup>   | 134 ± 16              | 123 ± 10                | 0.087    | 4.3              | 0.023    | 1.7              | 0.028       | 0.7              |
|                                         | Biceps brachii   | 123 ± 26              | 140 ± 9               | 170 ± 45                 | 115 ± 29                | 148 ± 9               | 142 ± 17                | 0.585    | 0.6              | 0.206    | 0.5              | 0.044       | 0.2              |
|                                         | Triceps brachii  | 83 ± 17 <sup>c</sup>  | 89 ± 18 <sup>c</sup>  | 145 ± 43 <sup>abd</sup>  | 78 ± 13 <sup>c</sup>    | 114 ± 16              | 100 ± 6                 | 0.079    | 7.2              | 0.014    | 1.8              | 0.012       | 0.6              |

408 Note: <sup>a</sup> = Significantly ( $p < 0.05$ ) different from ADV women; <sup>b</sup> = Significantly ( $p < 0.05$ ) different from ADV men; <sup>c</sup> = Significantly  
409 ( $p < 0.05$ ) different from REC women; <sup>d</sup> = Significantly ( $p < 0.05$ ) different from REC men; <sup>e</sup> = Significantly ( $p < 0.05$ ) different from  
410 CON women; <sup>f</sup> = Significantly ( $p < 0.05$ ) different from CON men.

## 411 **Peak aerobic capacity**

412 No significant group x sex interactions were observed for  $\text{VO}_2\text{peak}$  ( $F = 1.09$ ,  $p = 0.358$ ,  
413  $\text{BF}_{10} = 10.1$ ), RCT ( $F = 0.32$ ,  $p = 0.730$ ,  $\text{BF}_{10} = 1.7$ ), or GET ( $F = 0.05$ ,  $p = 0.949$ ,  $\text{BF}_{10} = 1.1$ ).  
414 However, *moderate-to-strong* evidence were found in favor of main group effects for each  
415 variable.  $\text{VO}_2\text{peak}$  ( $F = 9.10$ ,  $p = 0.002$ ,  $\text{BF}_{10} = 17.0$ ) and RCT ( $F = 5.56$ ,  $p = 0.014$ ,  $\text{BF}_{10} = 4.5$ )  
416 were significantly greater in ADV compared to REC ( $p \leq 0.039$ ) and CON ( $p \leq 0.020$ ), while  
417 GET ( $F = 5.29$ ,  $p = 0.016$ ,  $\text{BF}_{10} = 5.7$ ) was significantly greater in ADV compared to CON ( $p =$   
418  $0.016$ ) and tended to be greater compared to REC ( $p = 0.087$ ). No differences were seen between  
419 REC and CON. Further, the percentage of  $\text{VO}_2\text{peak}$  for GET and RCT were similar between  
420 ADV (GET =  $55.2 \pm 11.2\%$ ; RCT =  $71.7 \pm 7.5\%$ ), REC (GET =  $55.9 \pm 6.8\%$ ; RCT =  $73.5 \pm$   
421  $5.9\%$ ), and CON (GET =  $53.9 \pm 4.3\%$ ; RCT =  $74.6 \pm 7.7\%$ ). Group differences in absolute  
422 measures of aerobic performance are illustrated in Fig 2.

423  
424 Fig 2. Group differences in aerobic performance measures.

425 *Note:* \* = Significantly ( $p < 0.05$ ) different from ADV. # = Different ( $p < 0.10$ ) from ADV.  
426

## 427 **Resting metabolic rate**

428 Neither a group x sex interaction ( $F = 0.21$ ,  $p = 0.817$ ,  $\text{BF}_{10} = 0.2$ ) or main group effect  
429 ( $F = 1.67$ ,  $p = 0.220$ ,  $\text{BF}_{10} = 0.1$ ) was observed for RMR recordings in ADV ( $1788 \pm 232$   
430  $\text{kcal} \cdot \text{day}^{-1}$ ), REC ( $1768 \pm 407 \text{kcal} \cdot \text{day}^{-1}$ ), and CON ( $1572 \pm 356 \text{kcal} \cdot \text{day}^{-1}$ ).

## 431 **Body composition**

432 No significant group x sex interactions were observed for any measure of body  
433 composition (presented in Table 2). However, the evidence was *strongly-to-extremely* in favor of  
434 main group effects for body density, regional and total BMC, regional and total lean mass, and  
435 BF%. Compared to the REC, ADV possessed greater body density ( $p = 0.004$ ), greater BMC of

436 the arms ( $p = 0.009$ ), greater lean mass (i.e., total and regional;  $p \leq 0.035$ ), lower BF% ( $p =$   
437  $0.009$ ), and tended to possess more BMC (total-body:  $p = 0.066$ ; legs:  $p = 0.060$ ) and less fat  
438 mass ( $p = 0.064$ ). Compared to CON, ADV possessed greater body density ( $p = 0.006$ ), greater  
439 BMC throughout the body ( $p \leq 0.024$ ), lean mass throughout the body ( $p \leq 0.009$ ), and lower  
440 BF% ( $p = 0.023$ ). No differences were observed between REC and CON.



441 Table 2. Group differences in measures of body composition.

|                                    | ADV         |              |             | REC         |              |              | CON         |             |              | Group |                  | Group x Sex |                  |
|------------------------------------|-------------|--------------|-------------|-------------|--------------|--------------|-------------|-------------|--------------|-------|------------------|-------------|------------------|
|                                    | Women       | Men          | Total       | Women       | Men          | Total        | Women       | Men         | Total        | p     | BF <sub>10</sub> | p           | BF <sub>10</sub> |
| <i>Anthropometric</i>              |             |              |             |             |              |              |             |             |              |       |                  |             |                  |
| Height (cm)                        | 160 ± 13    | 177 ± 3      | 170 ± 11    | 161 ± 4     | 183 ± 8      | 172 ± 14     | 158 ± 4     | 180 ± 9     | 171 ± 14     | 0.785 | >100             | 0.526       | 0.3              |
| Weight (kg)                        | 68.3 ± 5.0  | 91.5 ± 5.1   | 79.8 ± 13.3 | 59.0 ± 2.0  | 93.5 ± 9.5   | 76.3 ± 19.5  | 60.8 ± 6.3  | 84.9 ± 7.3  | 74.5 ± 14.3  | 0.127 | >100             | 0.169       | 0.3              |
| BMI (kg·m <sup>-2</sup> )          | 26.0 ± 3.5  | 29.2 ± 1.9   | 27.6 ± 3.1  | 22.9 ± 1.2  | 28.0 ± 3.4   | 25.5 ± 3.6   | 24.4 ± 3.4  | 26.1 ± 0.7  | 25.4 ± 2.2   | 0.163 | 6.6              | 0.456       | 0.6              |
| Density (kg·L <sup>-1</sup> )      | 1.07 ± 0.01 | 1.07 ± 0.01  | 1.07 ± 0.01 | 1.05 ± 0.01 | 1.06 ± 0.01  | 1.05 ± 0.01* | 1.04 ± 0.02 | 1.06 ± 0.01 | 1.05 ± 0.02* | 0.002 | 13.8             | 0.159       | 1.1              |
| <i>Bone Mineral Content (kg)</i>   |             |              |             |             |              |              |             |             |              |       |                  |             |                  |
| Total                              | 3.05 ± 0.38 | 3.75 ± 0.13  | 3.45 ± 0.44 | 2.42 ± 0.16 | 3.62 ± 0.41  | 3.02 ± 0.70# | 2.43 ± 0.14 | 3.29 ± 0.41 | 2.92 ± 0.55* | 0.012 | >100             | 0.299       | 0.7              |
| Arms                               | 0.45 ± 0.07 | 0.62 ± 0.05  | 0.55 ± 0.11 | 0.32 ± 0.03 | 0.57 ± 0.05  | 0.44 ± 0.14* | 0.30 ± 0.01 | 0.48 ± 0.06 | 0.40 ± 0.11* | 0.001 | >100             | 0.266       | 1.2              |
| Legs                               | 1.12 ± 0.13 | 1.44 ± 0.11  | 1.30 ± 0.20 | 0.82 ± 0.05 | 1.38 ± 0.17  | 1.10 ± 0.32# | 0.81 ± 0.03 | 1.31 ± 0.22 | 1.09 ± 0.31* | 0.022 | >100             | 0.255       | 0.5              |
| Trunk                              | 0.95 ± 0.11 | 1.16 ± 0.03  | 1.07 ± 0.13 | 0.79 ± 0.11 | 1.11 ± 0.14  | 0.95 ± 0.21  | 0.82 ± 0.08 | 0.97 ± 0.09 | 0.90 ± 0.11* | 0.028 | >100             | 0.271       | 0.8              |
| <i>Non-bone fat-free mass (kg)</i> |             |              |             |             |              |              |             |             |              |       |                  |             |                  |
| Arms                               | 7.15 ± 0.89 | 11.12 ± 1.22 | 9.42 ± 2.35 | 4.87 ± 0.49 | 10.02 ± 0.56 | 7.45 ± 2.79* | 4.83 ± 0.42 | 9.04 ± 1.14 | 7.24 ± 2.40* | 0.001 | >100             | 0.400       | 0.6              |
| Legs                               | 18.4 ± 1.4  | 25.4 ± 1.6   | 22.4 ± 4.0  | 14.3 ± 1.0  | 24.4 ± 1.1   | 19.3 ± 5.4*  | 14.7 ± 0.7  | 22.5 ± 3.2  | 19.2 ± 4.7*  | 0.008 | >100             | 0.252       | 0.5              |
| Trunk                              | 27.7 ± 2.9  | 35.2 ± 2.0   | 32.0 ± 4.5  | 20.3 ± 1.2  | 33.5 ± 1.4   | 26.9 ± 7.2*  | 21.4 ± 2.2  | 30.1 ± 3.7  | 26.4 ± 5.5*  | 0.001 | >100             | 0.073       | 0.8              |
| <i>4-compartment model</i>         |             |              |             |             |              |              |             |             |              |       |                  |             |                  |
| Body fat percentage (%)            | 11.9 ± 2.4  | 11.0 ± 2.6   | 11.4 ± 2.3  | 23.3 ± 2.4  | 16.1 ± 6.2   | 19.7 ± 5.8*  | 23.9 ± 8.4  | 13.7 ± 3.2  | 18.1 ± 7.6*  | 0.007 | 16.1             | 0.183       | 2.7              |
| Fat-free mass (kg)                 | 60.2 ± 3.5  | 81.3 ± 3.4   | 72.3 ± 11.7 | 45.2 ± 2.3  | 78.1 ± 5.3   | 61.7 ± 18.0* | 45.9 ± 1.6  | 73.3 ± 8.4  | 61.6 ± 15.9* | 0.001 | >100             | 0.097       | 0.5              |
| Fat mass (kg)                      | 8.2 ± 2.1   | 10.2 ± 2.7   | 9.3 ± 2.5   | 13.8 ± 1.4  | 15.4 ± 7.0   | 14.6 ± 4.7#  | 14.9 ± 6.7  | 11.5 ± 2.2  | 13.0 ± 4.5   | 0.069 | 1.5              | 0.436       | 0.3              |

442 Note: \* = Significantly (p < 0.05) different from ADV, # = Different (p < 0.10) from ADV.

## 443 **Strength**

444 No significant group x sex interactions were observed for variables obtained from the  
445 isometric mid-thigh pull assessment. *Extreme* evidence suggested significant main group effects  
446 for F (F = 3.89,  $p = 0.042$ ,  $BF_{10} = 667,577$ ) and RFD at 200 ms (F = 3.67,  $p = 0.049$ ,  $BF_{10} =$   
447 12,676), as well as tendencies for group differences in F at 150 ms (F = 2.80,  $p = 0.091$ ,  $BF_{10} =$   
448 1,898), F at 200 ms (F = 3.50,  $p = 0.055$ ,  $BF_{10} = 17,296$ ), F at 250 ms (F = 3.14,  $p = 0.071$ ,  $BF_{10}$   
449 = 21524), RFD at 150 ms (F = 2.94,  $p = 0.082$ ,  $BF_{10} = 1,868$ ), and RFD at 250 ms (F = 3.37,  $p =$   
450 0.060,  $BF_{10} = 20,187$ ). According to post-hoc analysis, ADV produced a higher peak F than  
451 CON ( $p = 0.036$ ) and expressed greater RFD at 200 ms than REC ( $p = 0.049$ ). ADV also tended  
452 to produce greater F at 200 ms ( $p = 0.062$ ) and 250 ms ( $p = 0.097$ ) compared to REC. No other  
453 specific differences were seen between groups. Group differences in F and RFD production  
454 across time are illustrated in Fig 3.

455  
456 Fig 3. Group differences in A) force and B) rate of force production during an isometric mid-  
457 thigh pull.

458 *Note:* \* = Significantly ( $p < 0.05$ ) different from ADV. # = Different ( $p < 0.10$ ) from ADV.  
459

## 460 **Anaerobic performance**

461 No significant group x sex interactions were observed. *Extreme* evidence in favor of a  
462 significant group main effect for CP (F = 7.56,  $p = 0.005$ ,  $BF_{10} = 267$ ) indicated that ADV  
463 possessed a higher CP than REC ( $p = 0.029$ ) and CON ( $p = 0.005$ ). Although extreme evidence  
464 was also seen for AWC (F = 4.79,  $p = 0.023$ ,  $BF_{10} = 247$ ), post-hoc analysis did not reveal  
465 specific group differences. No other differences were observed. Group differences in anaerobic  
466 performance are illustrated in Fig 4.

467 Fig 4. Group differences in A) anaerobic work capacity, B) peak power, and C) critical power.  
468 *Note:* \* = Significantly ( $p < 0.05$ ) different than ADV

469  
470  
471  
472  
473  
474  
475  
476  
477  
478  
479  
480  
481  
482  
483  
484  
485  
486  
487  
488  
489  
490  
491

## DISCUSSION

The primary objectives of this study were to examine anthropometric, hormonal, and physiological differences between advanced CF athletes, recreational CF participants, and resistance and cardiovascular trained adults. Previously, only one other cross-sectional investigation has made physiological comparisons between individuals with at least one year of CF or resistance-training experience (27). The authors reported no differences between the groups except for the CF-trained group possessing greater aerobic ability. This outcome, however, is not surprising considering that the resistance-trained group was not required to also have been performing aerobic exercise. Typical CF training workouts will concurrently incorporate strength and conditioning elements into training (1, 2, 50). Although the conditioning component varies in intensity and duration for each workout, it is important that alternative exercise strategies include both elements to make a fair comparison. The present study builds upon this limitation by having required participants in the CON group to have been participating in both resistance and cardiovascular training on at least 3 days per week each; a similar training frequency was expected of the recreational CF group (i.e., training on at least 3 days per week). Another important aspect of CF training worth consideration is that it includes a wide variety of traditional resistance and aerobic training exercises, along with simple-to-complex gymnastic movements. Proficiency in these movements cannot be assumed after only a year of training and would likely necessitate frequent workout modification. Recently, our group has reported different physiological responses and recovery rates to CF workouts that are completed as prescribed versus those that are modified (i.e., scaled) (11). Thus, CF-trained participants were required to possess at least two years of experience and they were further divided into ADV and

492 REC based upon evidence of their skill as CF athletes (i.e., their previous success in CF  
493 competition). Within these contexts, advanced CF athletes were observed to have a more  
494 favorable body composition and muscular morphological characteristics, as well as greater  
495 aerobic capacity, strength, and ability to sustain high-intensity effort compared to recreational CF  
496 participants and physically-active adults. In contrast, no differences were observed between  
497 recreational CF participants and physically-active adults in any measure and no differences were  
498 seen in resting hormone concentrations or metabolic rate across all groups. This is the first  
499 investigation to make comparisons among CF practitioners based on their competitive rank and  
500 relative to resistance- and cardiovascular-trained, active adults.

501 Most competitive CF workouts require athletes to perform 2 or more exercises in a circuit  
502 or listwise fashion for several repetitions and rounds, and to do so as quickly as possible or to  
503 complete as much work as possible within a given time limit (1, 2, 50). Athletes who can  
504 maintain a faster pace or rapidly recover between minimal rest periods would appear to be best  
505 positioned to excel in this sport. A recent study in advanced CF athletes, as determined by their  
506 performance in a common benchmark workout (i.e., “Fran”), supports this idea (51). Feito et al.  
507 (2018) found that the best predictor of repetitions completed during a 15-minute CF workout was  
508 the amount of work the athletes could perform on the final trial of four maximal Wingate sprints  
509 separated by 90 seconds of rest. In the present study, the ADV group possessed a lower  
510 percentage of body fat and greater non-bone fat-free mass compared to the REC and CON  
511 groups. In sports, possessing an ideal ratio of skeletal muscle to fat mass may offer a competitive  
512 advantage by improving efficiency, thermoregulation, and the ability to sustain effort (52). Aside  
513 from their historical success in CF competition, the ADV group’s performance during aerobic  
514 and anaerobic testing provide evidence of this ability. ADV participants possessed a higher

515  $\text{VO}_2$  peak than the other groups, which would imply that they were able to perform aerobic work  
516 throughout a greater range of workloads (53, 54) but it does not completely explain their ability  
517 to sustain effort at higher intensities (55). As the oxygen requirements of a workload exceed an  
518 athlete's capacity to efficiently deliver oxygen, the ability to sustain effort may be further  
519 explained by measures of anaerobic performance and specific threshold points indicative of the  
520 onset of fatigue (i.e., GET, RCT, and CP) (47, 55, 56). Participants in the ADV group were also  
521 found to possess a higher GET, RCT, and CP, which are strongly correlated with each other CP  
522 (56) and are thought (specifically RCT and CP) to demarcate the point in which exercise  
523 transitions from 'heavy' to 'severe' (56, 57). Together, these data suggest that the ADV athletes  
524 in this study had a greater capacity to produce energy aerobically, and that they were better  
525 equipped to maintain efforts at higher absolute workloads and thus, be successful in their sport.

526         Skeletal mass and the morphological characteristics of muscle are suggestive of a greater  
527 ability to produce force (58-61). That is, the size, architecture and quality of skeletal muscle  
528 reflect the capability of activated muscle to produce force, whereas bone mass provides the  
529 structural support and stability needed to effectively translate force production into human  
530 movement. In the present study, ADV athletes possessed greater bone and muscle mass/size,  
531 larger pennation angles, shorter fascicles, and better quality in the arm and quadriceps  
532 musculature compared to the other groups. However, these only partially translated to greater  
533 force production by ADV group participants during the IMTP test. IMTP performance was  
534 highly variable until 0 to 200 – 250 ms, upon which ADV clearly produced greater force and at a  
535 faster rate. The lack of uniformity across all strength measures might be explained by testing  
536 specificity and the skillset of our sample. The importance of being able to rapidly activate muscle  
537 (i.e., higher RFD) and the magnitude of IMTP force production varies across sports and athletic

538 activities. In weightlifters, significant relationships have been reported between one-repetition  
539 maximums in the Olympic lifts and IMTP force (peak and from 0 to 100 – 250 ms) (62) but  
540 relationships to RFD have either been limited to specific time bands (from 0 to 200 – 250 ms)  
541 (62) or remain unclear in other athletes (63, 64). Although maximal strength in the Olympic and  
542 power lifts can distinguish competitive ranking in CF athletes (8, 10), it is not a common  
543 requisite of CF competition to maximally perform these lifts. Rather, most competitive workouts  
544 either utilize submaximal loads that are performed for several repetitions or they require the  
545 athlete to perform maximal (or near maximal) lifts after a fatiguing task (i.e., not a true measure  
546 of maximal strength) (50). It is also possible that the composition of the ADV group may help  
547 explain the variability observed prior to 200 ms. While all ADV group participants ranked higher  
548 than REC in the Open, their participation in later rounds of the Games competition had primarily  
549 occurred as part of a team. Within this capacity, team members may be included based on their  
550 skill set (e.g., strong/powerful athletes, gymnastically-skilled athletes, endurance athletes) to  
551 minimize team weaknesses. This differs from individual competitors who must be proficient in a  
552 broader set of skills to be competitive (8, 10). Currently, evidence documenting the physiological  
553 differences between high-ranking individual and team competitors does not exist.

554         There is little evidence to suggest that consistent alterations will occur to resting  
555 concentrations in T, C, or IGF-1 as a result of chronic training (14). Rather, their concentrations  
556 generally reflect the current status of muscle tissue in response to the demands of training. An  
557 overreaching period, marked by elevated training intensity or volume, might elicit transient  
558 elevations in T and IGF-1 that typically return to baseline once training returns to ‘normal’ while  
559 prolonged overreaching (or overstress) periods may elicit elevations in C (14). CF training is  
560 characterized by an effort to maximize training density (i.e., complete a set amount of work as

561 quickly as possible, or maximize work completed within given time frame) within an unplanned  
562 (i.e., non-periodized) training structure to promote general physical preparedness (1, 2). Further,  
563 the 5-week Open is the most common avenue used by athletes to qualify for the Games (4, 5).  
564 Prior to an important competitive event, athletes may elevate training intensity to promote peak  
565 performance (65). Thus, the combination of the CF training strategy and the approach of an  
566 important, extended competitive event could increase the likelihood of a prolonged period of  
567 overstress. The occurrence of which might be identified by changes in resting hormonal  
568 concentrations, resting metabolic rate, performance, as well as a variety of other factors (14, 66,  
569 67). However, the present investigation did not reveal any evidence of prolonged stress or  
570 negative adaptations to training. Resting hormone concentrations and metabolic rates were  
571 similar between groups and the physiological advantages demonstrated by the ADV group  
572 appeared to reflect their reported training habits over the past six months (via medical and  
573 physical activity history questionnaire). Excluding the conditioning component typically present  
574 in CF workouts, members from each group reported using a similar number of sets per muscle  
575 group (3 – 6), repetitions (3 – 12), and rest intervals (60 – 90 seconds) during the strength  
576 component of their workouts. Only training frequency was reported to be different with the ADV  
577 group utilizing a form of resistance exercise on approximately 5.3 days per week whereas the  
578 REC and CON groups averaged 4.6 days per week and 3.7 days per week, respectively.  
579 Although the greater training frequency seen in ADV would have theoretically provided more of  
580 an opportunity to accumulate training volume and promote adaptations, it could have also  
581 interfered with their recovery. Nevertheless, ADV possessed a more favorable body composition  
582 and generally outperformed the other groups in each performance measure. Therefore, as of one-  
583 month prior to competition, adequate recovery appeared to be present in this group. Likewise,

584 the lack of differences seen between REC and CON, who were not actively training for the  
585 Open, also provides evidence of adequate recovery. Future investigations can expand on this by  
586 monitoring performance surrounding the extended Open competition.

587         The findings of this study suggest that advanced CF athletes possess a more favorable  
588 body composition, greater bone and muscle mass, greater muscle quality and strength, greater  
589 aerobic capacity, and a greater ability to sustain effort than recreational CF participants and  
590 physically-active adults. The reasons for these differences remain unclear due to the cross-  
591 sectional design of this study but may be related to differences in training experience and recent  
592 training habits. Although all participants in this study could be considered well-trained (68),  
593 ADV group participants reported having more resistance training experience and having been  
594 training more frequently over the past 6 months than the other groups. It is possible that their  
595 advantages are simply the result of training for a longer amount of time or creating more  
596 opportunities to increase their volume load throughout the week. Without documentation (i.e.,  
597 extensive, detailed training logs), however, it is only possible to speculate upon their potential  
598 influence as unknown factors (e.g., training quality, genetic predisposition) would certainly  
599 modulate resultant adaptations. Further, the influence of daily variations in the conditioning  
600 components of CF workouts on effort and volume load, as well as how these might compare to  
601 traditional aerobic exercise (utilized by CON), remains unclear. It is interesting to note that  
602 despite the apparent differences in each training strategy (i.e., CF conditioning and traditional  
603 aerobic exercise), no differences were seen between REC and CON. To be included in this study,  
604 both had to have been regularly participating in their chosen training strategy on 3 – 5 days per  
605 week for at least the past year. Nevertheless, REC and CON were found to possess similar  
606 physiological characteristics. Future longitudinal investigations that document both the quality



607 and quantity of these training forms may help to provide insight into whether an advantage exists  
608 between these strategies or if they promote comparable adaptations among recreationally-active  
609 adults.

610

## REFERENCES

- 611 1. Glassman G. CrossFit training guide level 1.: The CrossFit Journal; 2011.
- 612 2. Feito Y, Heinrich K, Butcher S, Poston W. High-Intensity Functional Training (HIFT):  
613 Definition and Research Implications for Improved Fitness. *Sports*. 2018;6(3):76.
- 614 3. Thompson WR. Worldwide survey of fitness trends for 2018: the CREP edition. *ACSM's*  
615 *Health & Fitness Journal*. 2017;21(6):10-9.
- 616 4. CrossFit. Finding the Fittest on Earth. CrossFit Games [Internet]. 2016 August 29, 2019.  
617 Available from: <https://games.crossfit.com/workouts/open/2016>.
- 618 5. CrossFit. Welcome to the 2019 CrossFit Games Season. CrossFit Games [Internet]. 2016  
619 August 29, 2019.
- 620 6. Butcher SJ, Neyedly TJ, Horvey KJ, Benko CR. Do physiological measures predict  
621 selected crossFit® benchmark performance? *Open Access Journal of Sports Medicine*.  
622 2015;6:241.
- 623 7. Martínez-Gómez R, Valenzuela PL, Barranco-Gil D, Moral-González S, García-  
624 González A, Lucia A. Full-Squat as a Determinant of Performance in CrossFit. *International*  
625 *journal of sports medicine*. 2019;40(09):592-6.
- 626 8. Serafini PR, Feito Y, Mangine GT. Self-reported measures of strength and sport-specific  
627 skills distinguish ranking in an international online fitness competition. *Journal of strength and*  
628 *conditioning research*. 2018;32(12):3474-84.
- 629 9. Bellar D, Hatchett A, Judge L, Breaux M, Marcus L. The relationship of aerobic capacity,  
630 anaerobic peak power and experience to performance in CrossFit exercise. *Biology of Sport*.  
631 2015;32(4):315-20.
- 632 10. Barbieri JF, Correia RF, Castaño LAA, Brasil DVC, Ribeiro AN. Comparative and  
633 correlational analysis of the performance from 2016 crossfit games high-level athletes. *Manual*  
634 *Therapy, Posturology & Rehabilitation Journal= Revista Manual Therapy*. 2017;15.
- 635 11. Mangine GT, Kliszczewicz BM, Boone JB, Williamson-Reisdorph CM, Bechke EE. Pre-  
636 anticipatory anxiety and autonomic nervous system response to two unique fitness competition  
637 workouts. *Sports*. 2019;7(9):199.

- 638 12. Casto KV, Edwards DA. Testosterone, cortisol, and human competition. *Horm Behav.*  
639 2016;82:21-37.
- 640 13. Kivlighan KT, Granger DA. Salivary  $\alpha$ -amylase response to competition: Relation to  
641 gender, previous experience, and attitudes. *Psychoneuroendocrinology.* 2006;31(6):703-14.
- 642 14. Kraemer WJ, Ratamess NA. Hormonal responses and adaptations to resistance exercise  
643 and training. *Sports medicine.* 2005;35(4):339-61.
- 644 15. McGee KJ, Burkett LN. The National Football League Combine: A Reliable Predictor of  
645 Draft Status? *The Journal of Strength & Conditioning Research.* 2003;17(1):6-11.
- 646 16. Mangan GT, Hoffman JR, Vazquez J, Pichardo N, Fragala MS, Stout JR. Predictors of  
647 fielding performance in professional baseball players. *International Journal of Sports Physiology*  
648 *and Performance.* 2013;8(5):510-6.
- 649 17. Hoffman JR, Vazquez J, Pichardo N, Tenenbaum G. Anthropometric and performance  
650 comparisons in professional baseball players. *Journal of Strength & Conditioning Research.*  
651 2009;23(8):2173-8.
- 652 18. Mangan GT, Hoffman JR, Wells AJ, Gonzalez AM, Rogowski JP, Townsend JR, et al.  
653 Visual Tracking Speed Is Related to Basketball-Specific Measures of Performance in NBA  
654 Players. *The Journal of Strength & Conditioning Research.* 2014;28(9):2406-14.
- 655 19. Feito Y, Brown C, Olmos A. A content analysis of the High-Intensity Functional  
656 Training Literature: a look at the past and directions for the future. *Human Movement.*  
657 2019;20(2):1-15.
- 658 20. Heinrich KM, Spencer V, Fehl N, Carlos Poston WS. Mission essential fitness:  
659 comparison of functional circuit training to traditional Army physical training for active duty  
660 military. *Military Medicine.* 2012;177(10):1125-30.
- 661 21. Barfield J, Anderson A. Effect of CrossFit™ on health-related physical fitness: A pilot  
662 study. *Journal of Sport and Human Performance.* 2014;2(1).
- 663 22. Barfield J, Channell B, Pugh C, Tuck M, Pendel D. Format of basic instruction program  
664 resistance training classes: Effect on fitness change in college students. *Physical Educator.*  
665 2012;69(4):325.

- 666 23. Feito Y, Patel P, Sal Redondo A, Heinrich KM. Effects of Eight Weeks of High Intensity  
667 Functional Training on Glucose Control and Body Composition among Overweight and Obese  
668 Adults. *Sports*. 2019;7(2):51.
- 669 24. Buckley S, Knapp K, Lackie A, Lewry C, Horvey K, Benko C, et al. Multimodal high-  
670 intensity interval training increases muscle function and metabolic performance in females.  
671 *Applied Physiology, Nutrition, and Metabolism*. 2015;40(11):1157-62.
- 672 25. Carnes AJ, Mahoney SE. Polarized Versus High-Intensity Multimodal Training in  
673 Recreational Runners. *International journal of sports physiology and performance*.  
674 2019;14(1):105-12.
- 675 26. Ratamess N, Alvar B, Evetoch T, Housh T, Kibler W, Kraemer W. Progression models in  
676 resistance training for healthy adults [ACSM position stand]. *Medicine and Science in Sports and  
677 Exercise*. 2009;41(3):687-708.
- 678 27. de Sousa AF, dos Santos GB, dos Reis T, Valerino AJ, Del Rosso S, Boullosa DA.  
679 Differences in Physical Fitness between Recreational CrossFit® and Resistance Trained  
680 Individuals. *Journal of Exercise Physiology Online*. 2016;19(5).
- 681 28. Ichinose Y, Kanehisa H, Ito M, Kawakami Y, Fukunaga T. Morphological and functional  
682 differences in the elbow extensor muscle between highly trained male and female athletes.  
683 *European Journal of Applied Physiology and Occupational Physiology*. 1998;78(2):109-14.
- 684 29. Arroyo E, Stout JR, Beyer KS, Church DD, Varanoske AN, Fukuda DH, et al. Effects of  
685 supine rest duration on ultrasound measures of the vastus lateralis. *Clinical physiology and  
686 functional imaging*. 2018;38(1):155-7.
- 687 30. Cadore EL, Izquierdo M, Conceição M, Radaelli R, Pinto RS, Baroni BM, et al. Echo  
688 intensity is associated with skeletal muscle power and cardiovascular performance in elderly  
689 men. *Experimental Gerontology*. 2012;47(6):473-8.
- 690 31. Chapman DW, Newton M, McGuigan MR, Nosaka K. Comparison between old and  
691 young men for responses to fast velocity maximal lengthening contractions of the elbow flexors.  
692 *European Journal of Applied Physiology*. 2008;104(3):531-9.
- 693 32. Bemben M. Use of diagnostic ultrasound for assessing muscle size. *Journal of Strength &  
694 Conditioning Research*. 2002;16(1):103-8.

- 695 33. Scanlon TC, Fragala MS, Stout JR, Emerson NS, Beyer KS, Oliveira LP, et al. Muscle  
696 architecture and strength: Adaptations to short-term resistance training in older adults. *Muscle &*  
697 *Nerve*. 2013.
- 698 34. Young HJ, Jenkins NT, Zhao Q, Mccully KK. Measurement of intramuscular fat by  
699 muscle echo intensity. *Muscle & nerve*. 2015;52(6):963-71.
- 700 35. Kumagai K, Abe T, Brechue WF, Ryushi T, Takano S, Mizuno M. Sprint performance is  
701 related to muscle fascicle length in male 100-m sprinters. *Journal of Applied Physiology*.  
702 2000;88(3):811-6.
- 703 36. Astorino TA, Robergs RA, Ghiasvand F, Marks D, Burns S. Incidence of the oxygen  
704 plateau at VO<sub>2</sub>max during exercise testing to volitional fatigue. *Journal of exercise physiology*  
705 *online*. 2000;3(4):1-12.
- 706 37. Wasserman K, McIlroy MB. Detecting the threshold of anaerobic metabolism in cardiac  
707 patients during exercise. *The American journal of cardiology*. 1964;14(6):844-52.
- 708 38. Beaver WL, Wasserman K, Whipp BJ. A new method for detecting anaerobic threshold  
709 by gas exchange. *Journal of applied physiology*. 1986;60(6):2020-7.
- 710 39. Wasserman K, Whipp BJ, Koyl S, Beaver W. Anaerobic threshold and respiratory gas  
711 exchange during exercise. *Journal of applied physiology*. 1973;35(2):236-43.
- 712 40. Compher C, Frankenfield D, Keim N, Roth-Yousey L, Group EAW. Best practice  
713 methods to apply to measurement of resting metabolic rate in adults: a systematic review.  
714 *Journal of the American Dietetic Association*. 2006;106(6):881-903.
- 715 41. McCrory MA, Molé PA, Gomez TD, Dewey KG, Bernauer EM. Body composition by  
716 air-displacement plethysmography by using predicted and measured thoracic gas volumes.  
717 *Journal of Applied Physiology*. 1998;84(4):1475-9.
- 718 42. Wang Z, Deurenberg P, Guo SS, Pietrobelli A, Wang J, Pierson Jr R, et al. Six-  
719 compartment body composition model: inter-method comparisons of total body fat measurement.  
720 *International journal of obesity*. 1998;22(4):329.
- 721 43. Haff GG, Ruben RP, Lider J, Twine C, Cormie P. A comparison of methods for  
722 determining the rate of force development during isometric midthigh clean pulls. *The Journal of*  
723 *Strength & Conditioning Research*. 2015;29(2):386-95.

- 724 44. Bergstrom HC, Housh TJ, Zuniga JM, Traylor DA, Lewis Jr RW, Camic CL, et al.  
725 Differences among estimates of critical power and anaerobic work capacity derived from five  
726 mathematical models and the three-minute all-out test. *The Journal of Strength & Conditioning*  
727 *Research*. 2014;28(3):592-600.
- 728 45. Marsh AP, Martin PE. Effect of cycling experience, aerobic power, and power output on  
729 preferred and most economical cycling cadences. *Medicine and Science in Sports and Exercise*.  
730 1997;29(9):1225-32.
- 731 46. Burnley M, Doust JH, Vanhatalo A. A 3-min all-out test to determine peak oxygen  
732 uptake and the maximal steady state. *Medicine & Science in Sports & Exercise*.  
733 2006;38(11):1995-2003.
- 734 47. Vanhatalo A, Doust JH, Burnley M. Determination of critical power using a 3-min all-out  
735 cycling test. *Medicine and science in sports and exercise*. 2007;39(3):548-55.
- 736 48. Rouder JN, Morey RD, Speckman PL, Province JM. Default Bayes factors for ANOVA  
737 designs. *Journal of Mathematical Psychology*. 2012;56(5):356-74.
- 738 49. Wagenmakers E-J, Love J, Marsman M, Jamil T, Ly A, Verhagen J, et al. Bayesian  
739 inference for psychology. Part II: Example applications with JASP. *Psychonomic bulletin &*  
740 *review*. 2018;25(1):58-76.
- 741 50. CrossFit. Open Workouts. CrossFit Games [Internet]. 2019; (May 1). Available from:  
742 <https://games.crossfit.com/workouts/open/2019>.
- 743 51. Feito Y, Giardina MJ, Butcher S, Mangine GT. Repeated anaerobic tests predict  
744 performance among a group of advanced CrossFit-trained athletes. *Applied Physiology,*  
745 *Nutrition, and Metabolism*. 2018;44(7):727-35.
- 746 52. O'Connor H, Slater G. *Losing, gaining and making weight for athletes*. Sport and  
747 *Exercise Nutrition West Sussex, UK: Wiley-Blackwell*. 2011:210-32.
- 748 53. Hawkins MN, Raven PB, Snell PG, Stray-Gundersen J, Levine BD. Maximal oxygen  
749 uptake as a parametric measure of cardiorespiratory capacity. *Med Sci Sports Exerc*.  
750 2007;39(1):103-7.

- 751 54. Day JR, Rossiter HB, Coats EM, Skasick A, Whipp BJ. The maximally attainable VO<sub>2</sub>  
752 during exercise in humans: the peak vs. maximum issue. *Journal of applied physiology*.  
753 2003;95(5):1901-7.
- 754 55. Medbo JI, Tabata I. Relative importance of aerobic and anaerobic energy release during  
755 short-lasting exhausting bicycle exercise. *Journal of Applied Physiology*. 1989;67(5):1881-6.
- 756 56. Bergstrom HC, Housh TJ, Zuniga JM, Traylor DA, Camic CL, Lewis Jr RW, et al. The  
757 relationships among critical power determined from a 3-min all-out test, respiratory  
758 compensation point, gas exchange threshold, and ventilatory threshold. *Research quarterly for*  
759 *exercise and sport*. 2013;84(2):232-8.
- 760 57. Chicharro JL, Hoyos J, Lucía A. Effects of endurance training on the isocapnic buffering  
761 and hypocapnic hyperventilation phases in professional cyclists. *British journal of sports*  
762 *medicine*. 2000;34(6):450-5.
- 763 58. Miller TA. *NSCA's Guide to Tests and Assessments: Human Kinetics*; 2012.
- 764 59. Schipilow J, Macdonald H, Liphardt A, Kan M, Boyd S. Bone micro-architecture,  
765 estimated bone strength, and the muscle-bone interaction in elite athletes: an HR-pQCT study.  
766 *Bone*. 2013;56(2):281-9.
- 767 60. Lieber RL, Fridén J. Functional and clinical significance of skeletal muscle architecture.  
768 *Muscle & Nerve: Official Journal of the American Association of Electrodiagnostic Medicine*.  
769 2000;23(11):1647-66.
- 770 61. Stock MS, Mota JA, Hernandez JM, Thompson BJ. Echo intensity and muscle thickness  
771 as predictors Of athleticism and isometric strength in middle-school boys. *Muscle & nerve*.  
772 2017;55(5):685-92.
- 773 62. Beckham G, Mizuguchi S, Carter C, Sato K, Ramsey M, Lamont H, et al. Relationships  
774 of isometric mid-thigh pull variables to weightlifting performance. *J Sports Med Phys Fitness*.  
775 2013;53(5):573-81.
- 776 63. McGuigan MR, Winchester JB. The relationship between isometric and dynamic strength  
777 in college football players. *Journal of sports science & medicine*. 2008;7(1):101.

- 778 64. Stone MH, Sanborn K, O'BRYANT HS, HARTMAN M, STONE ME, PROULX C, et  
779 al. Maximum strength-power-performance relationships in collegiate throwers. *The Journal of*  
780 *Strength & Conditioning Research*. 2003;17(4):739-45.
- 781 65. Haff GG. Periodization for Tactical Populations. In: Alvar BA, Sell K, Deuster PA,  
782 editors. *NSCA's Essentials of Tactical Strength and Conditioning*. 1st ed. Champaign, IL:  
783 Human Kinetics, Inc.; 2015. p. 181 - 205.
- 784 66. Bahr R, Opstad P, Medbø J, Sejersted O. Strenuous prolonged exercise elevates resting  
785 metabolic rate and causes reduced mechanical efficiency. *Acta Physiologica Scandinavica*.  
786 1991;141(4):555-63.
- 787 67. Lee EC, Fragala MS, Kavouras SA, Queen RM, Pryor JL, Casa DJ. Biomarkers in sports  
788 and exercise: tracking health, performance, and recovery in athletes. *Journal of strength and*  
789 *conditioning research*. 2017;31(10):2920.
- 790 68. Sheppard JM, Triplett NT. Program Design for Resistance Training. In: Haff GG, Triplett  
791 NT, editors. *Essentials of Strength Training and Conditioning*. 4th ed: Human Kinetics; 2015. p.  
792 439 - 69.  
793



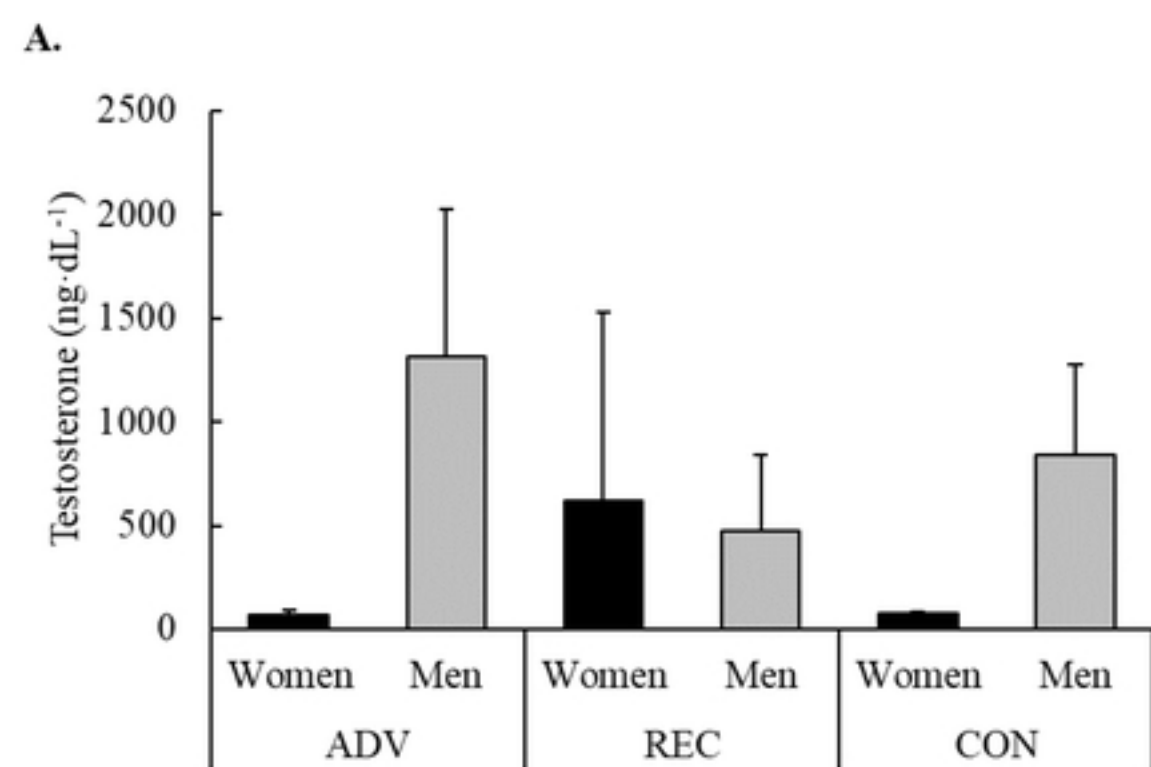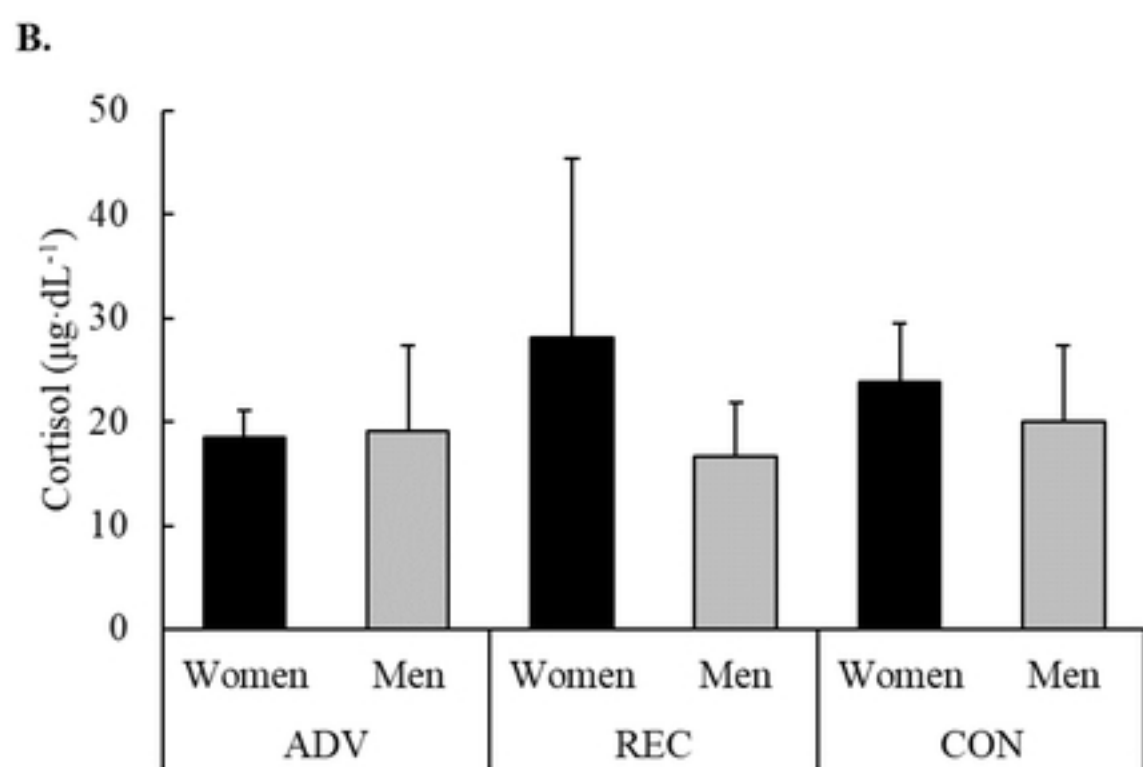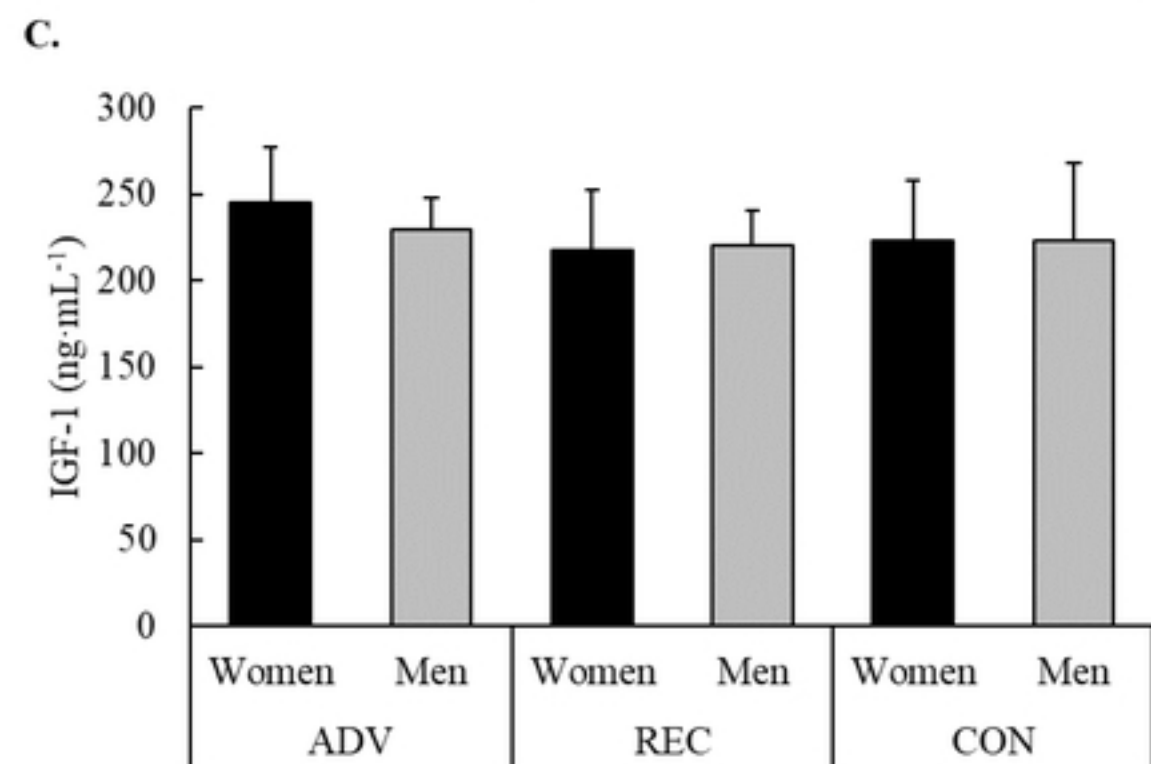

Figure 1

■ ADV    ■ REC    □ CON

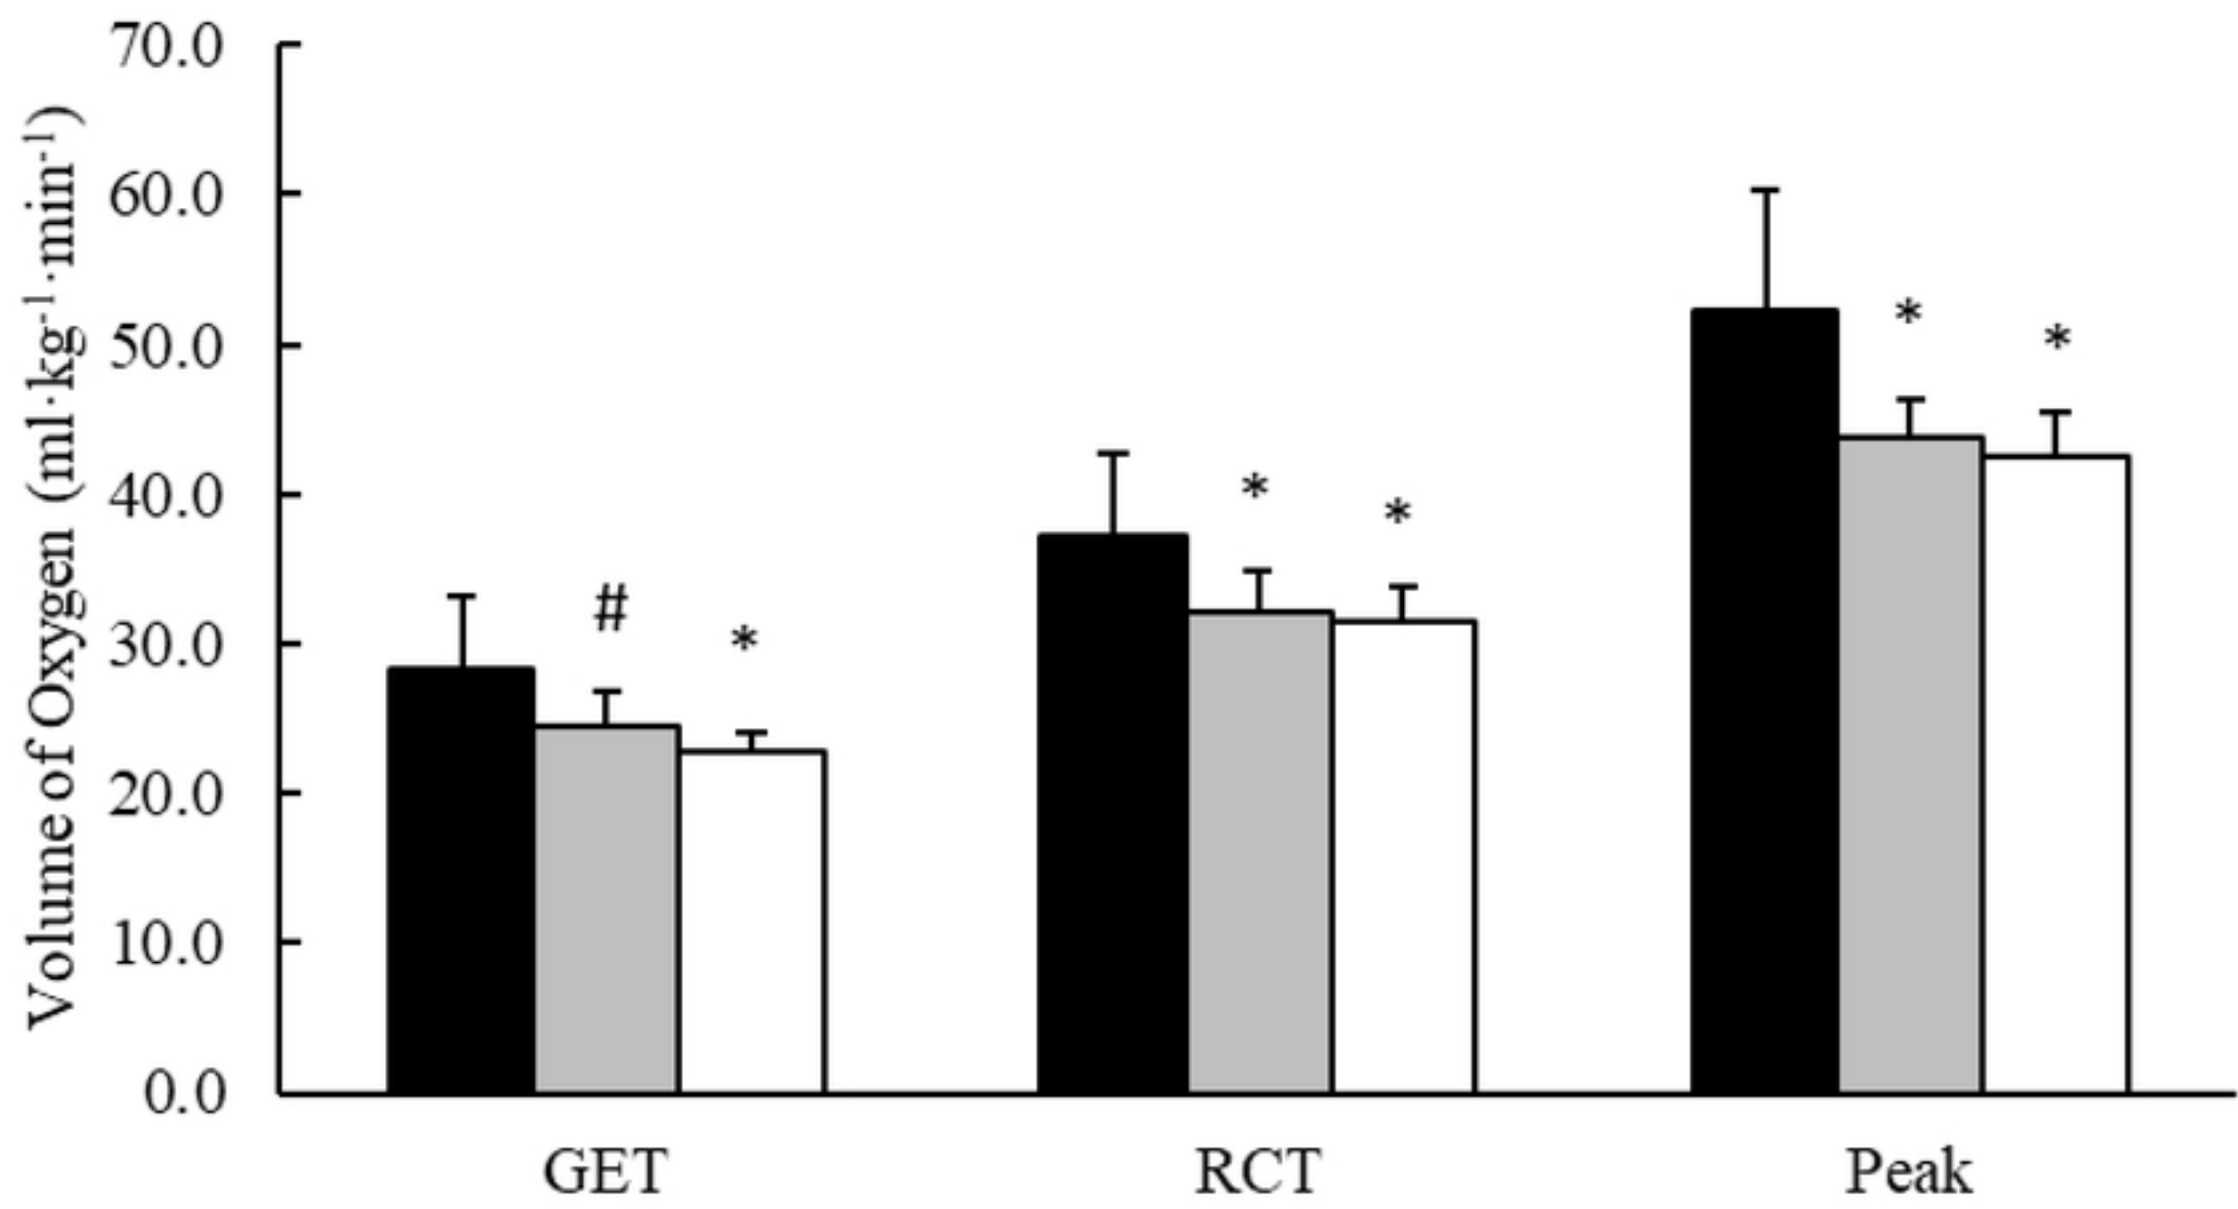

Figure 2

**A.**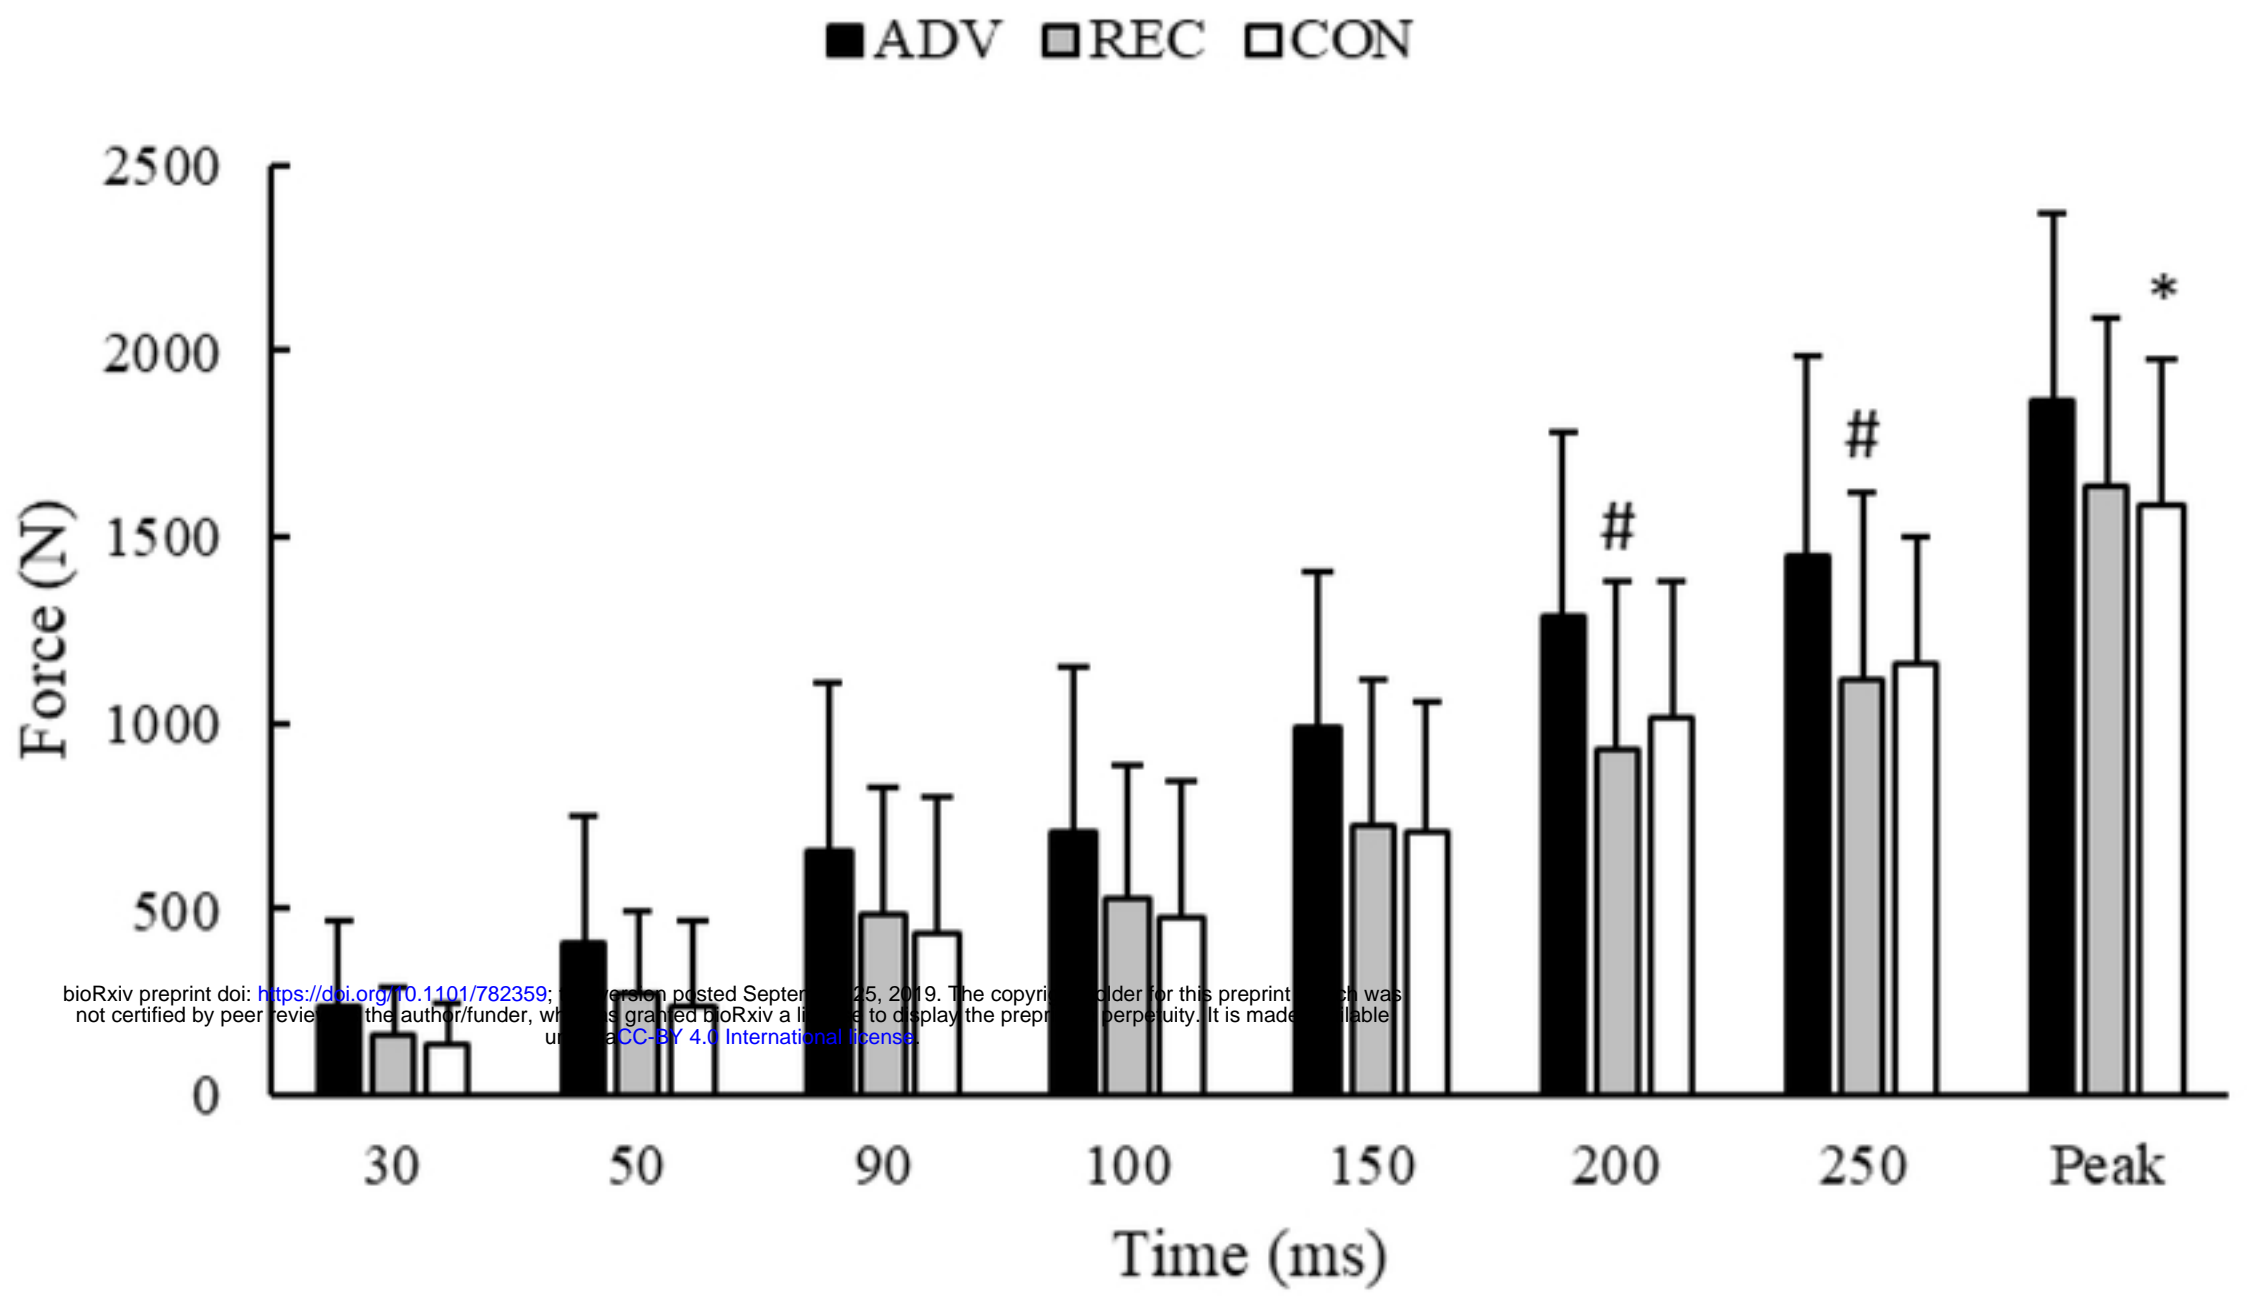**B.**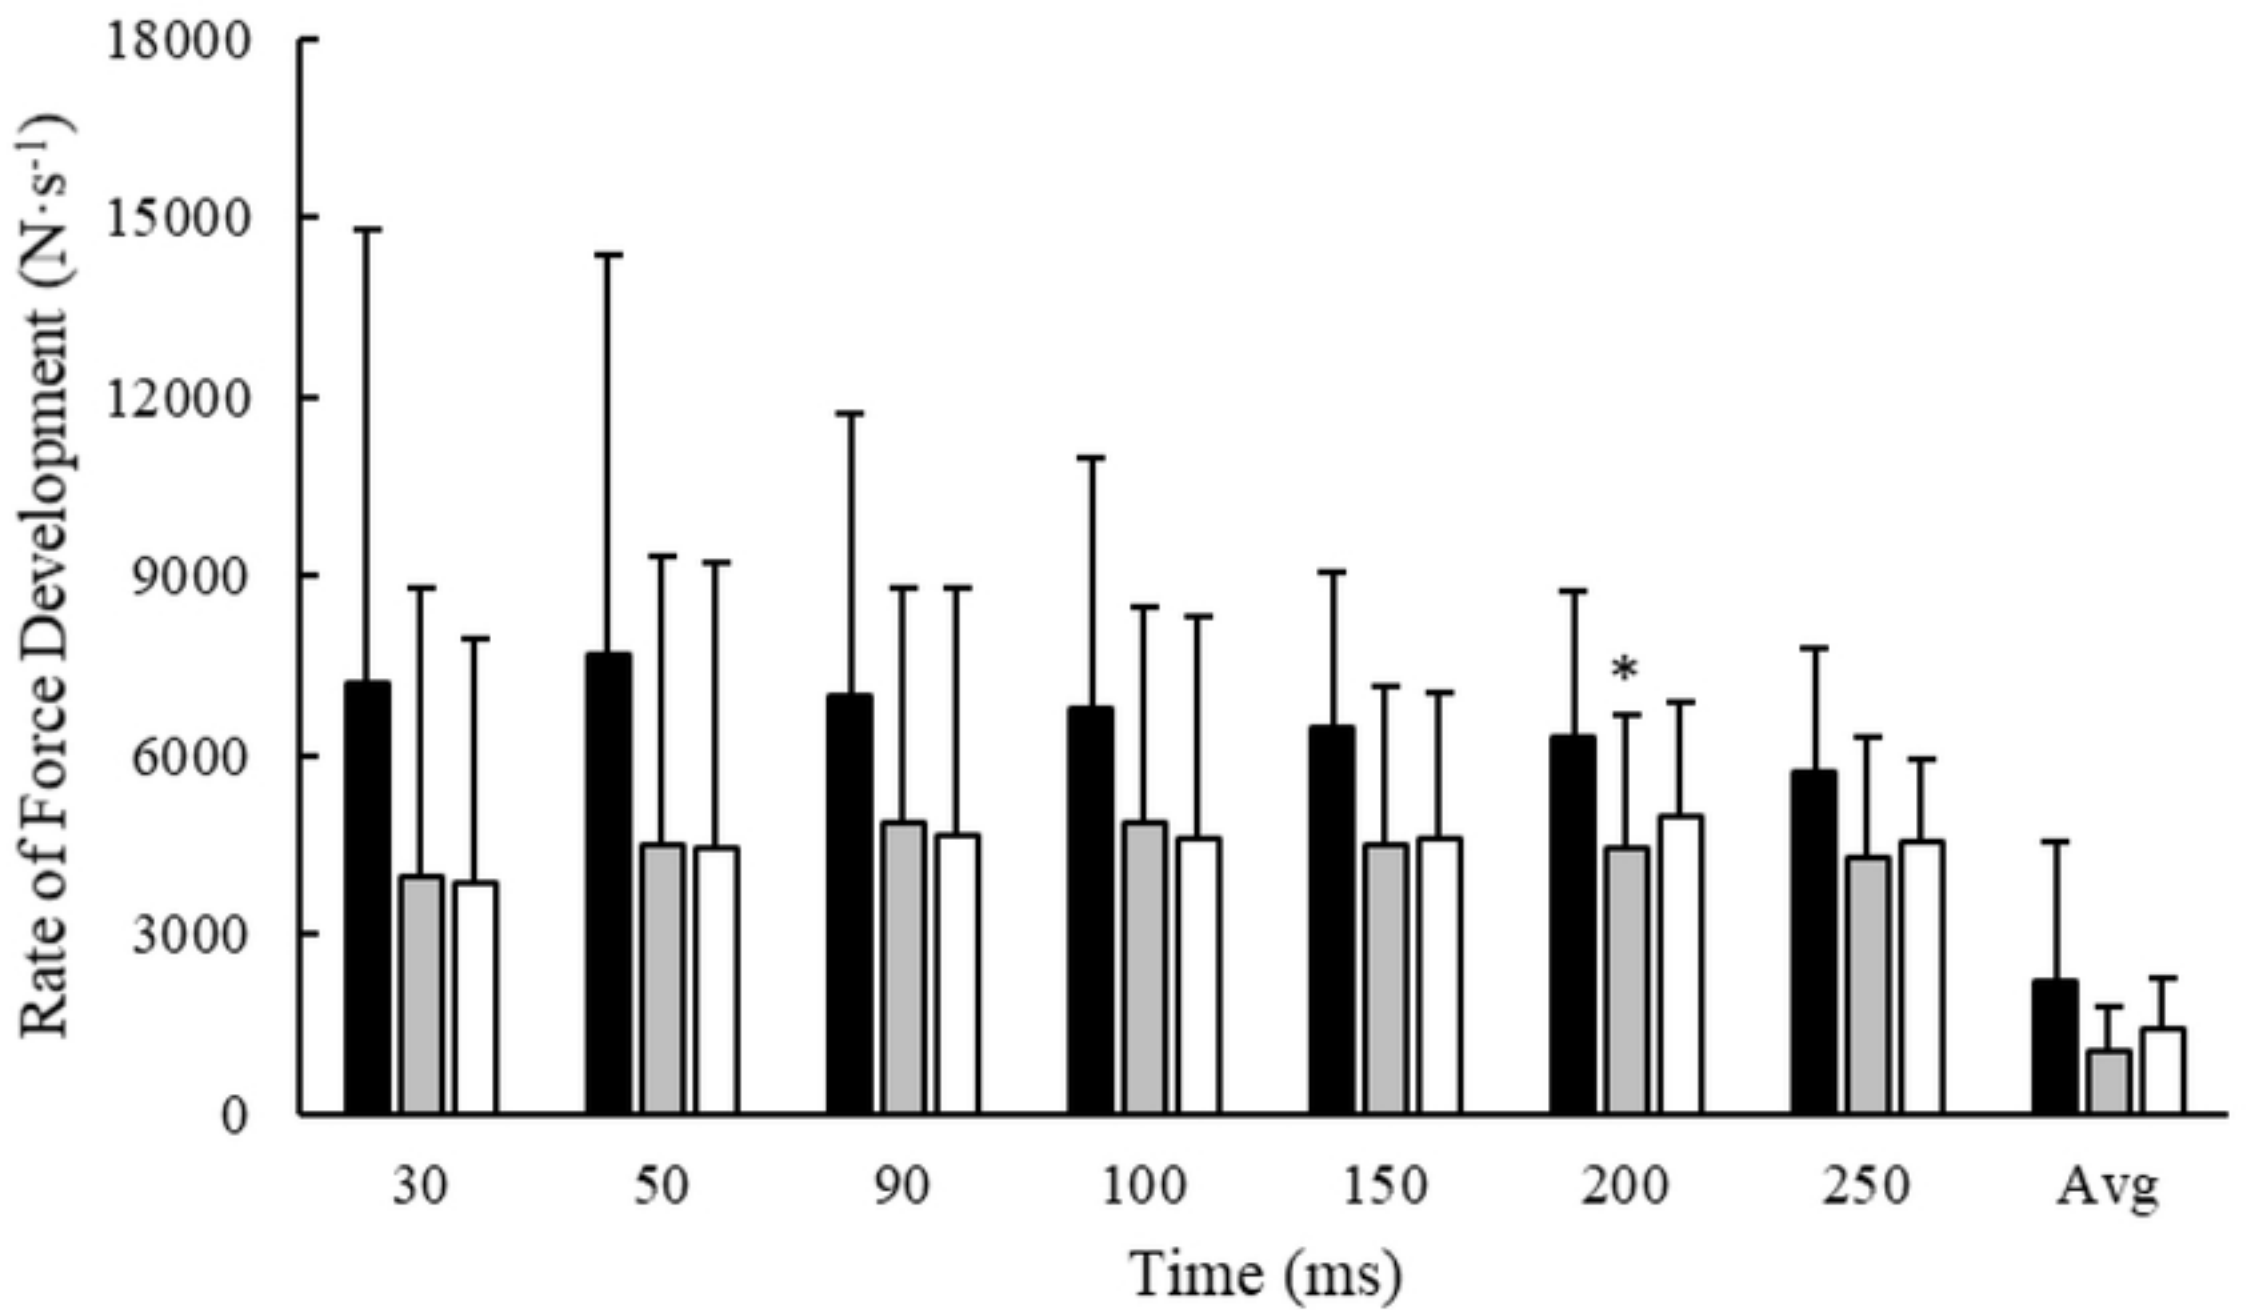

Figure 3

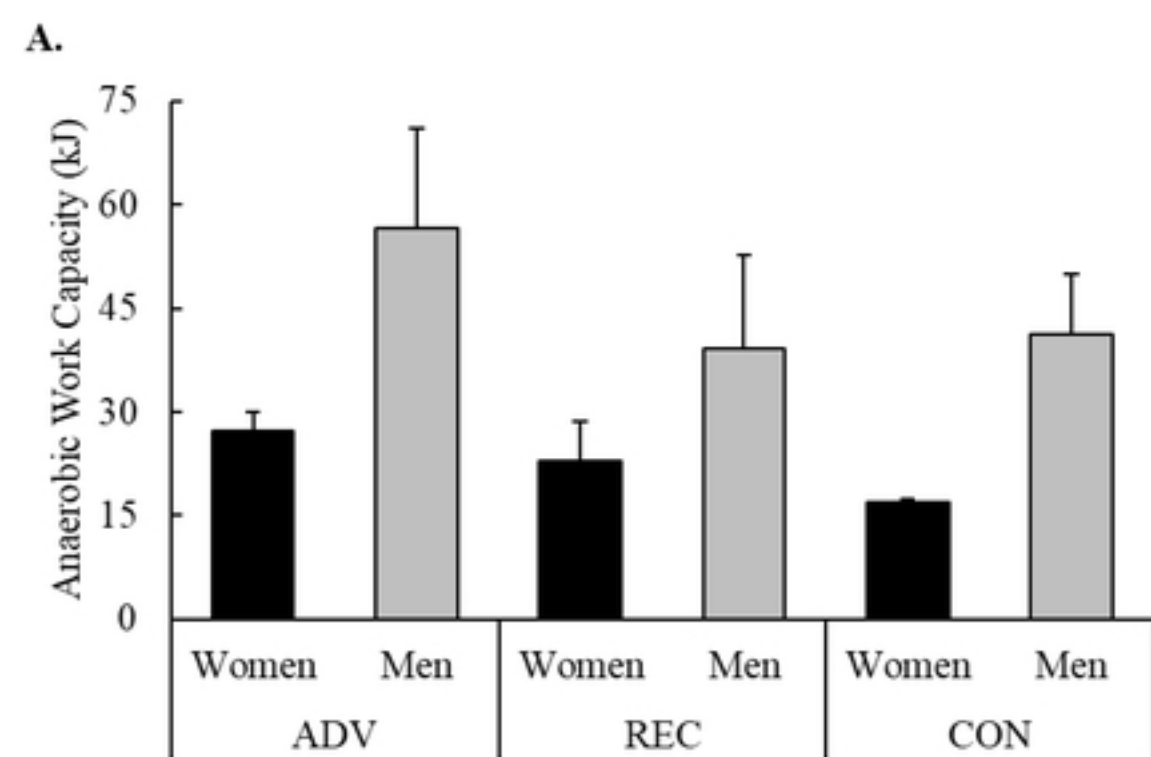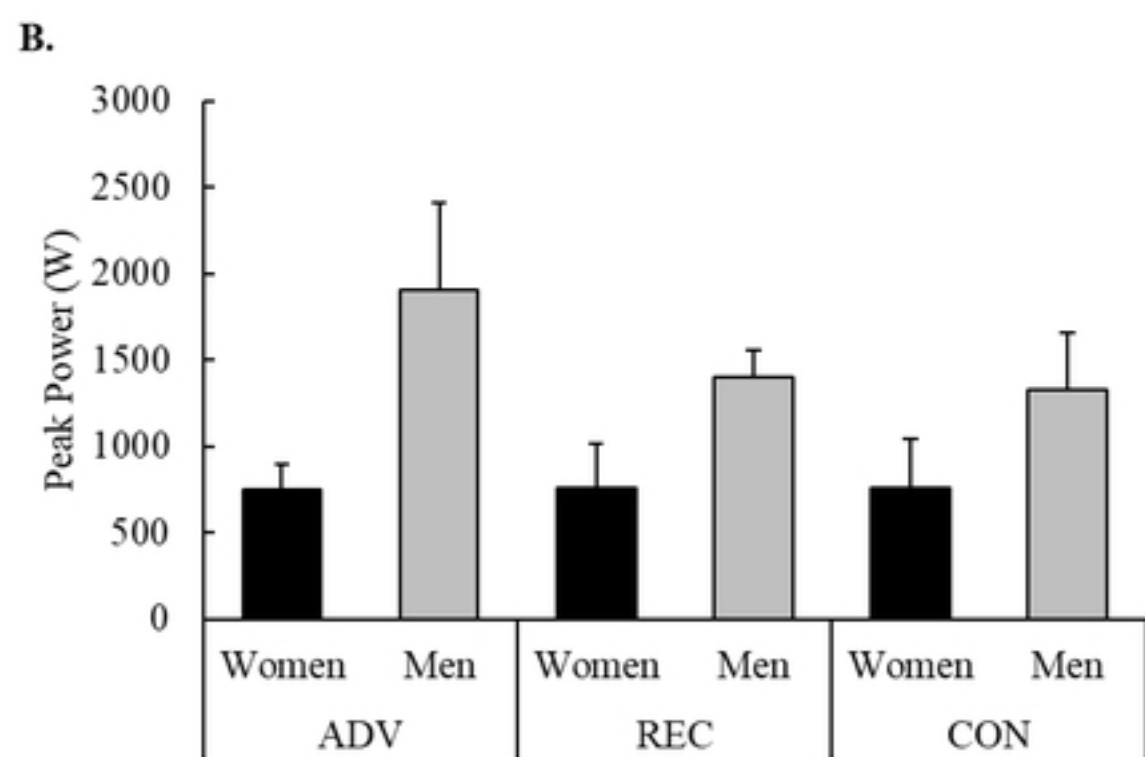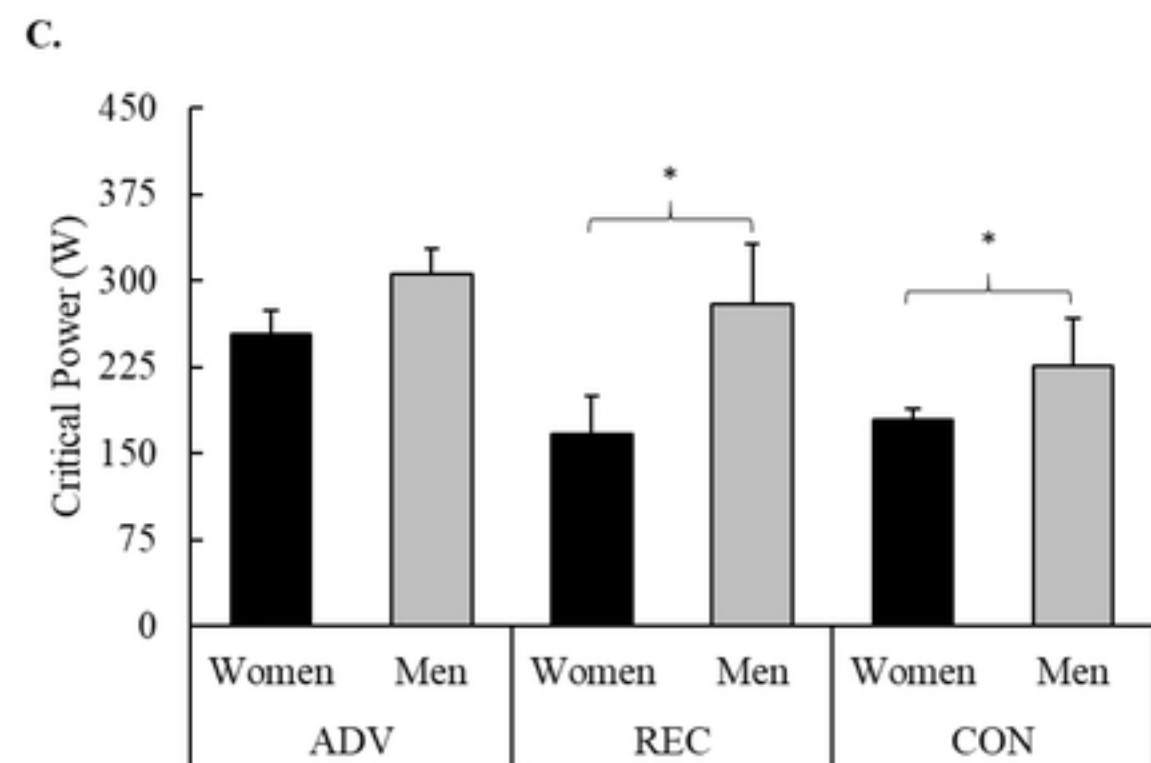

Figure 4
